# Supplementary material for: Linear scaffolds for multivalent targeting of melanocortin receptors
Source: Royal Society of Chemistry journal article supplement (doi:10.1039/c5ob01779c), 2015-01-01
Supplement: c5ob01779c1.pdf [file c5ob01779c1.pdf]

## Linear Scaffolds for Multivalent Targeting of Melanocortin Receptors

Dilani Chathurika Dehigaspitiya,<sup>a</sup> Bobbi L. Anglin,<sup>a</sup> Kara R. Smith,<sup>a</sup> Craig S. Weber,<sup>b</sup>

Ronald M. Lynch,<sup>b,c</sup> and Eugene A. Mash<sup>\*,a</sup>

<sup>a</sup>Department of Chemistry and Biochemistry, University of Arizona, Tucson, Arizona 85721-0041 USA.

<sup>b</sup>Department of Physiology, University of Arizona, Tucson, Arizona 85724-5051 USA.

<sup>c</sup>The Bio5 Institute, University of Arizona, Tucson, Arizona 85721-0240 USA.

### Supporting Information

|               |                                           |               |                                           |
|---------------|-------------------------------------------|---------------|-------------------------------------------|
| Page S1.....  | Table of Contents                         | Page S12..... | <sup>1</sup> H-NMR Spectrum of <b>19</b>  |
| Page S2.....  | <sup>1</sup> H-NMR Spectrum of <b>10</b>  | Page S13..... | <sup>13</sup> C-NMR Spectrum of <b>19</b> |
| Page S3.....  | <sup>13</sup> C-NMR Spectrum of <b>10</b> | Page S14..... | HPLC Chromatogram of <b>16</b>            |
| Page S4.....  | <sup>1</sup> H-NMR Spectrum of <b>12</b>  | Page S15..... | HPLC Chromatogram of <b>20</b>            |
| Page S5.....  | <sup>13</sup> C-NMR Spectrum of <b>12</b> | Page S16..... | HPLC Chromatogram of <b>21</b>            |
| Page S6.....  | <sup>1</sup> H-NMR Spectrum of <b>14</b>  | Page S17..... | HPLC Chromatogram of <b>22</b>            |
| Page S7.....  | <sup>13</sup> C-NMR Spectrum of <b>14</b> | Page S18..... | HPLC Chromatogram of <b>23</b>            |
| Page S8.....  | <sup>1</sup> H-NMR Spectrum of <b>15</b>  | Page S19..... | Data Analysis for the Binding Assays      |
| Page S9.....  | <sup>13</sup> C-NMR Spectrum of <b>15</b> | Page S20..... | Molecular Dynamics Studies                |
| Page S10..... | <sup>1</sup> H-NMR Spectrum of <b>17</b>  |               |                                           |
| Page S11..... | <sup>1</sup> H-NMR Spectrum of <b>18</b>  |               |                                           |

\* Corresponding author. Tel.: +1 520 621 6321; FAX +1 520 621 8407, *E-mail address*: emash@email.arizona.edu.

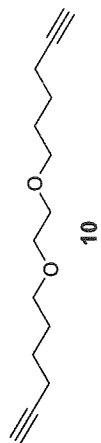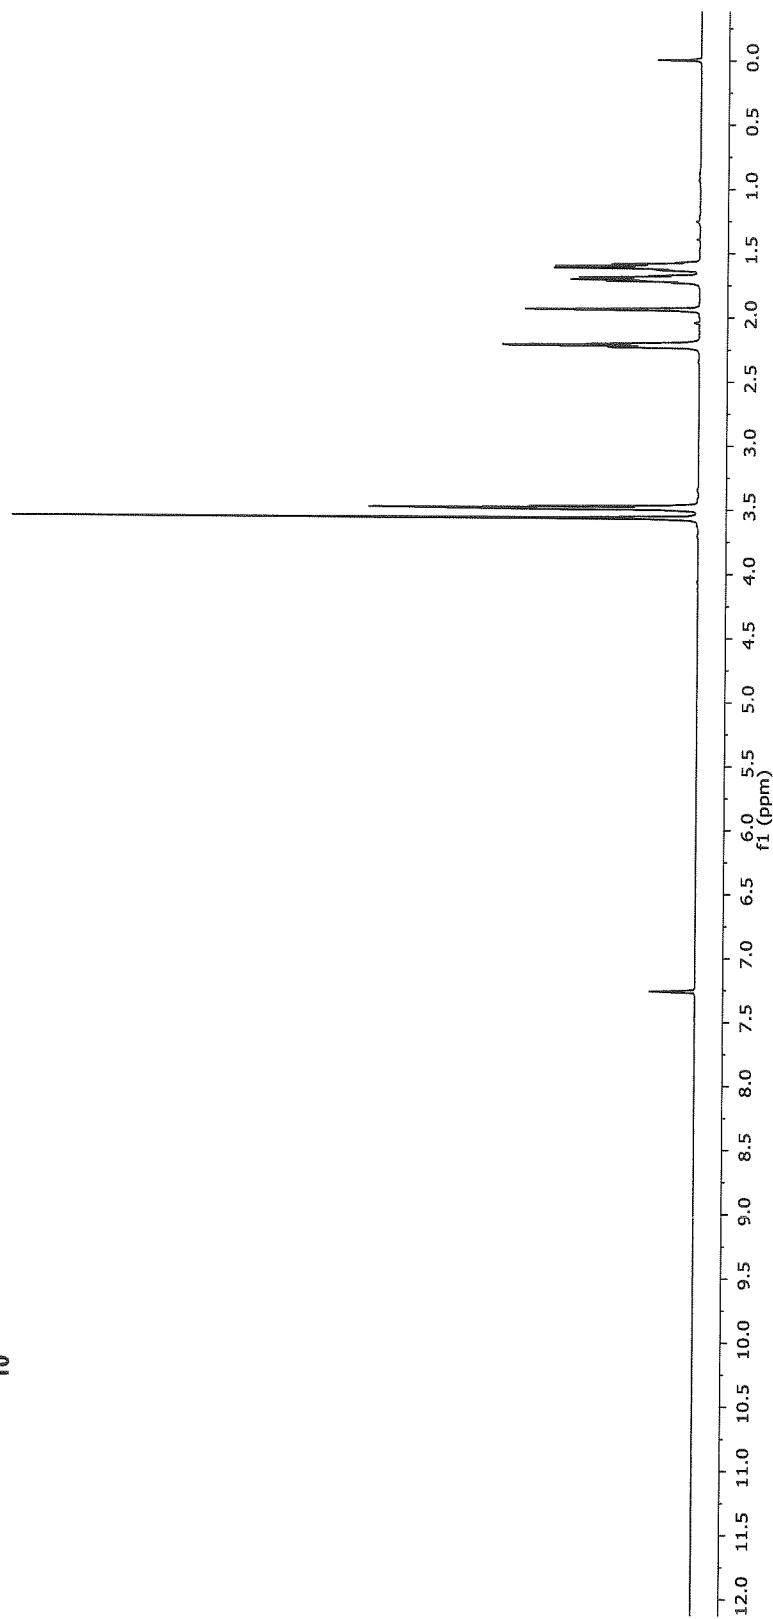

$^1\text{H}$  NMR Spectrum of Compound **10**

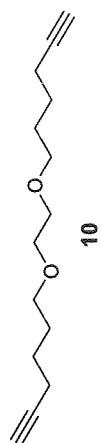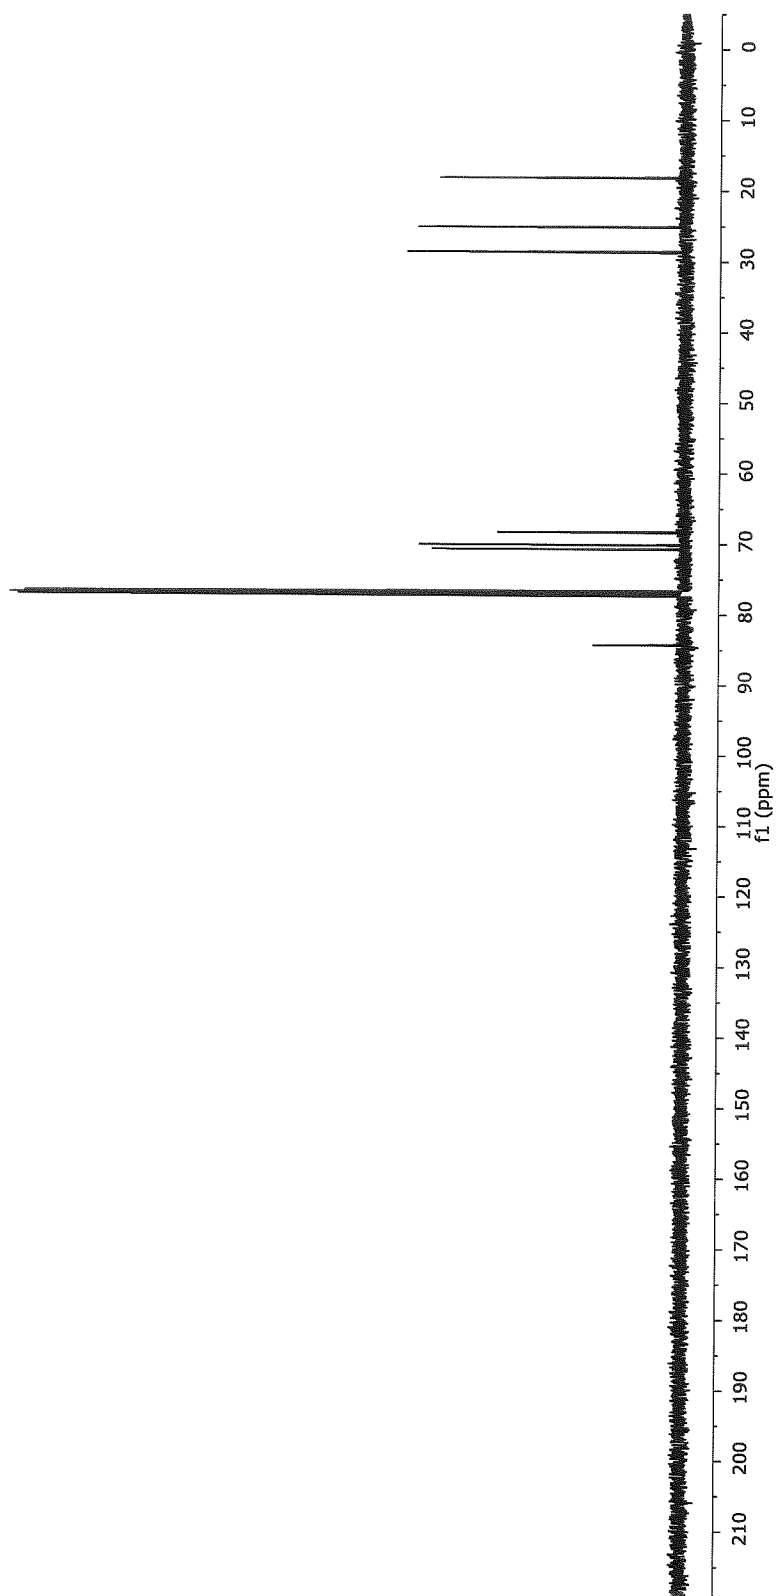

$^{13}\text{C}$  NMR Spectrum of Compound 10

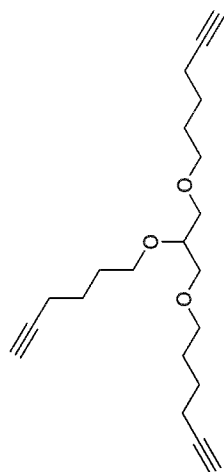

**12**

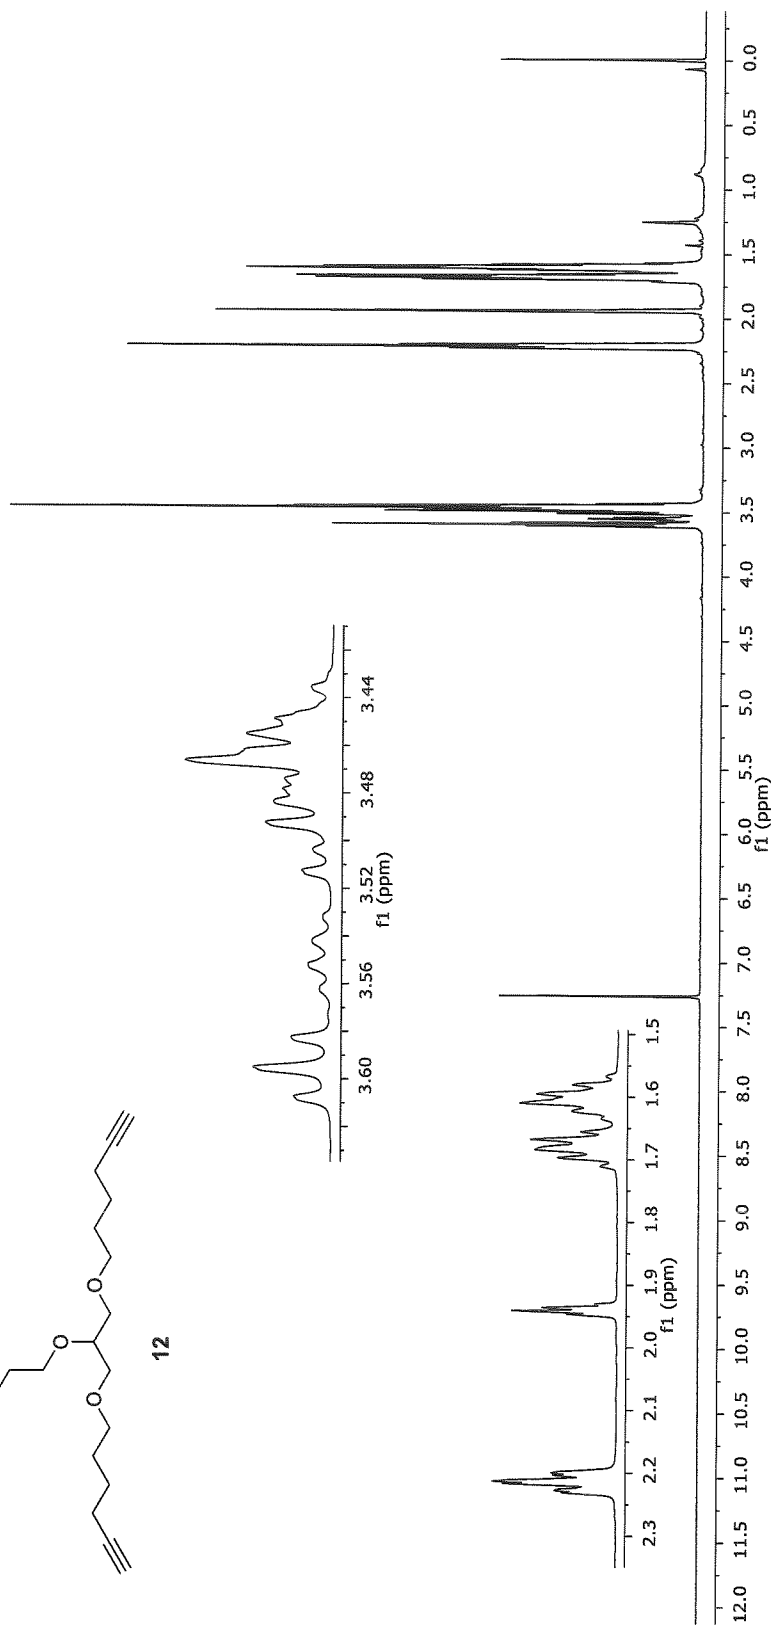

<sup>1</sup>H NMR Spectrum of Compound **12**

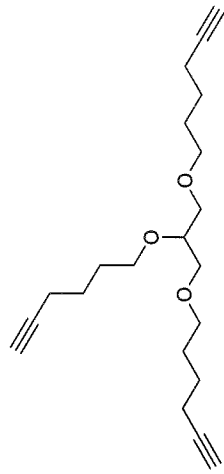

12

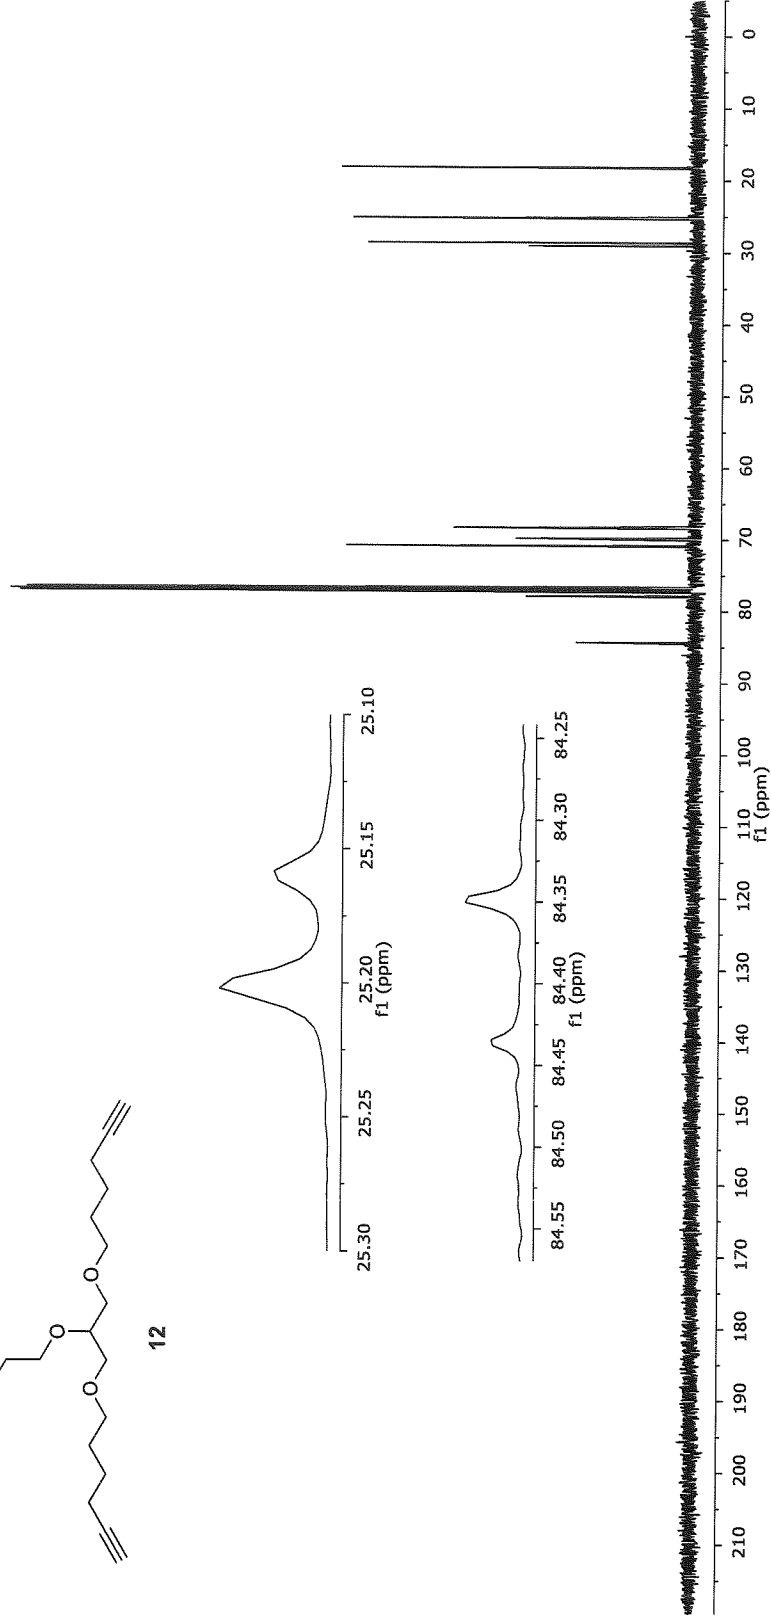

$^{13}\text{C}$  NMR Spectrum of Compound 12

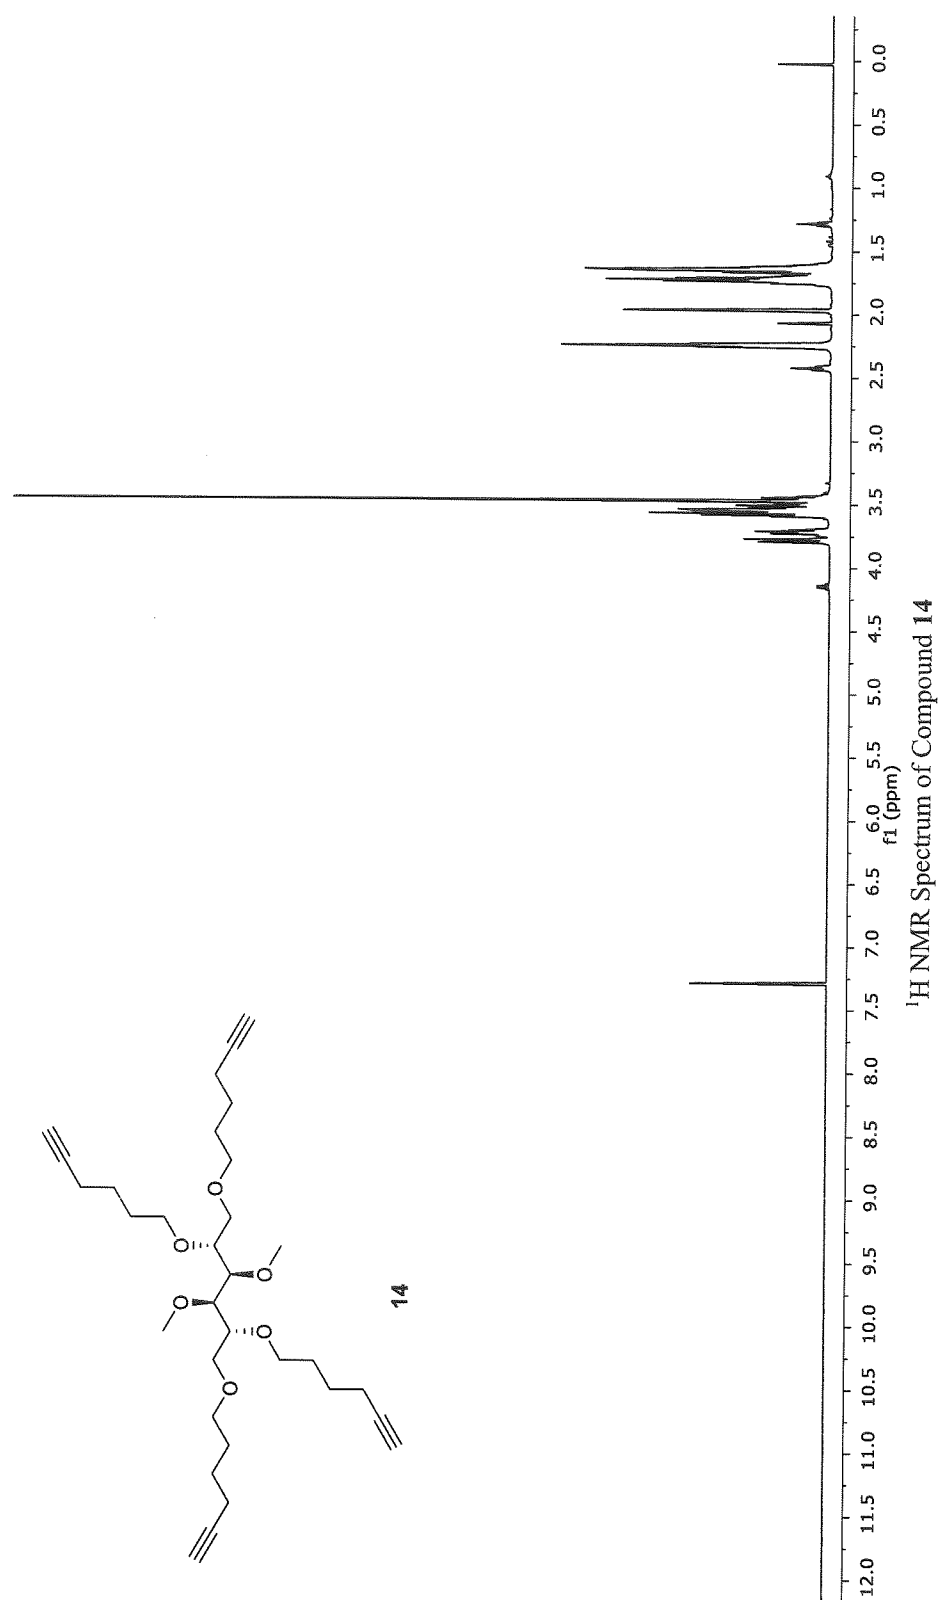

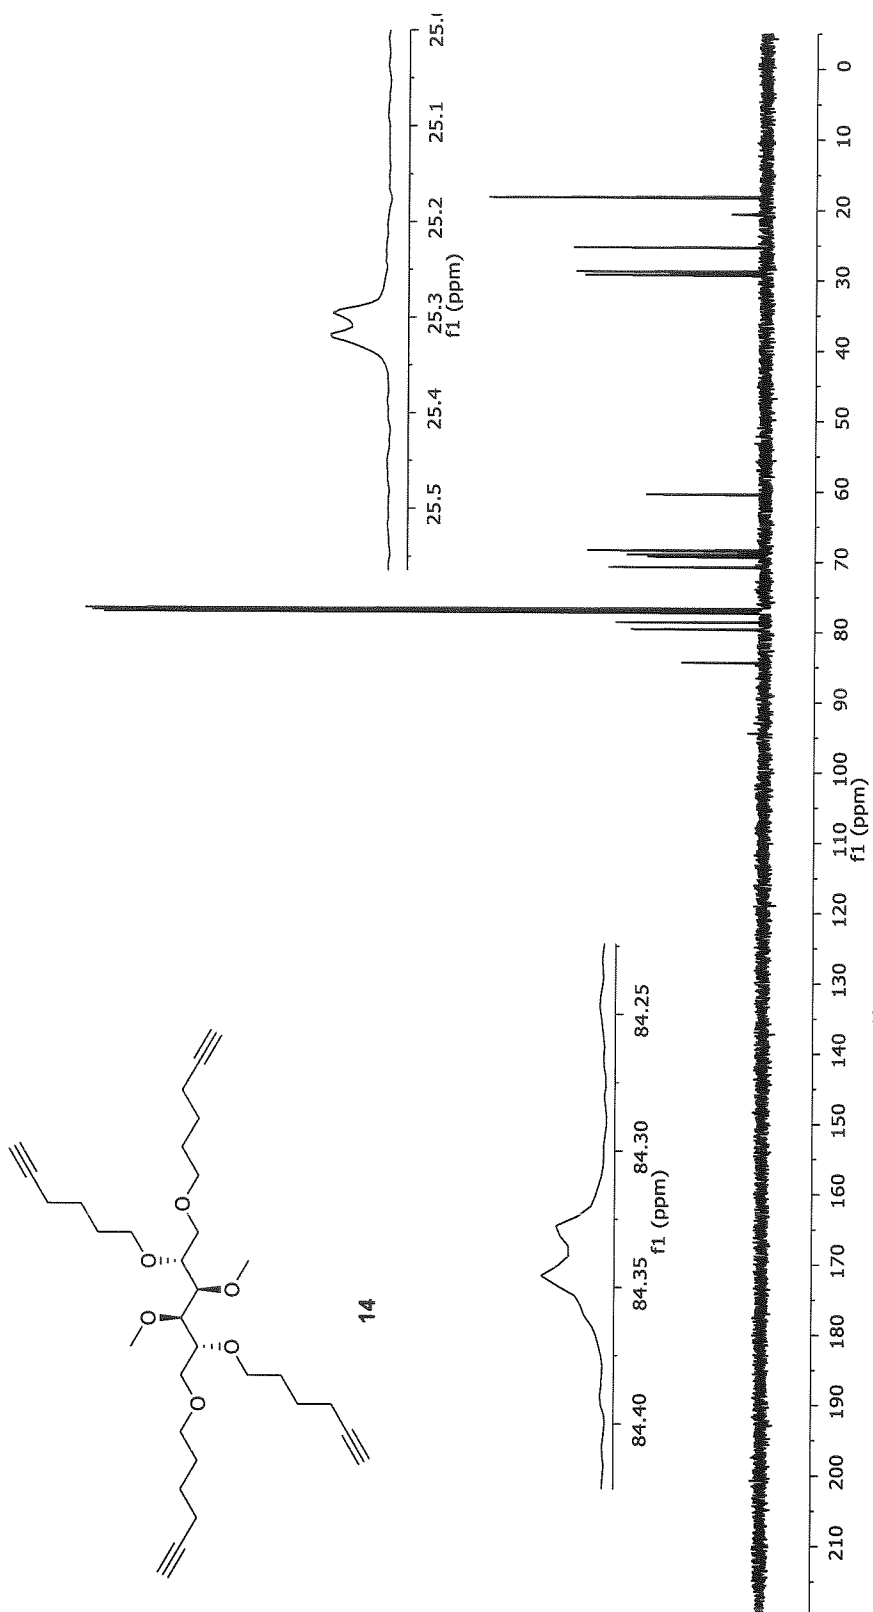

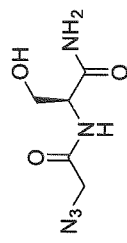

**15**

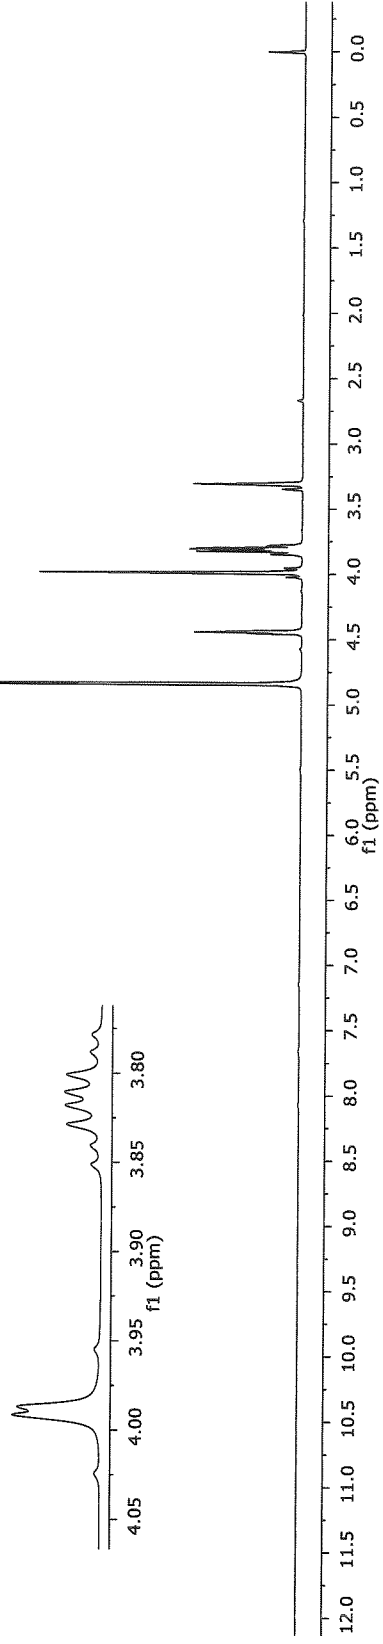



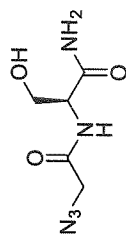

15

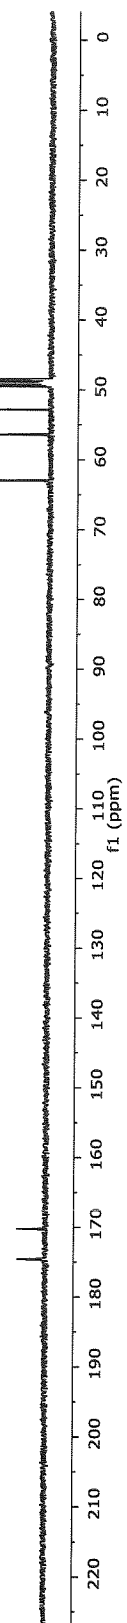

$^{13}\text{C}$  NMR Spectrum of Compound 15

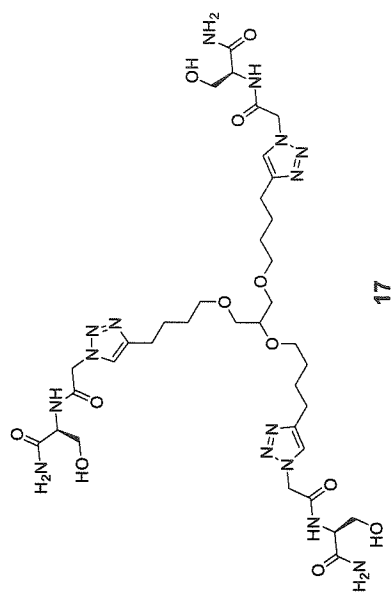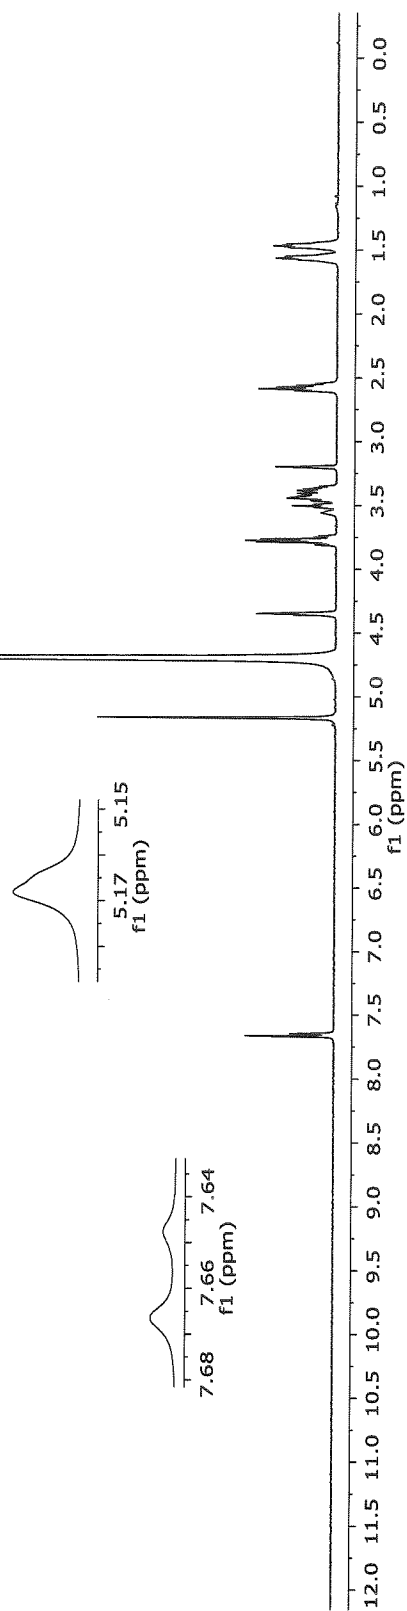

### <sup>1</sup>H NMR Spectrum of Compound 17

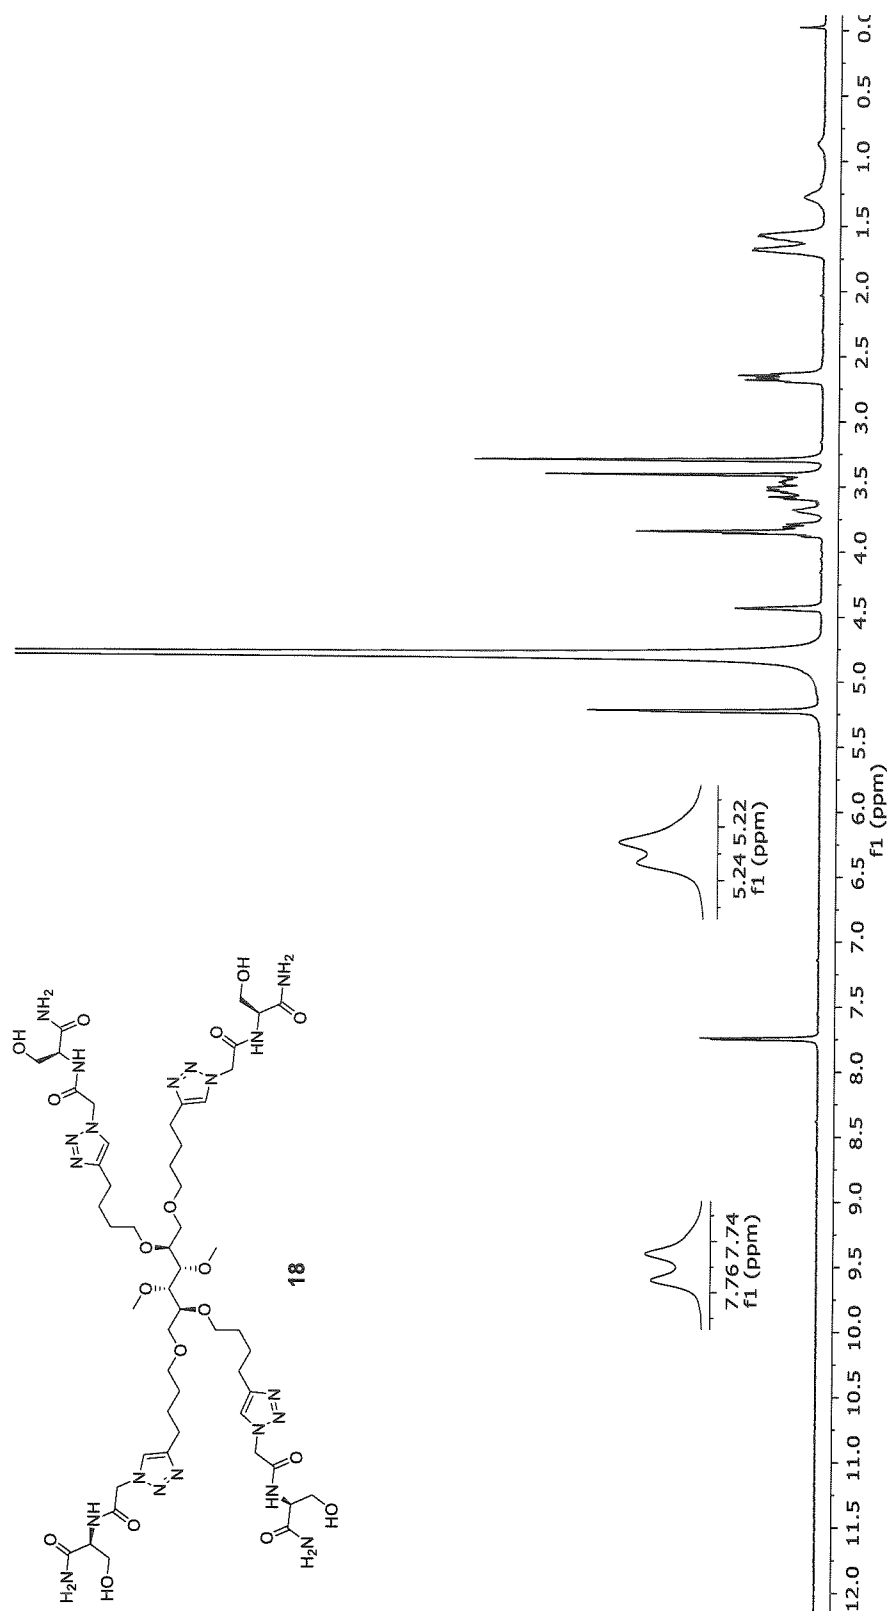 $^1\text{H}$  NMR Spectrum of Compound 18

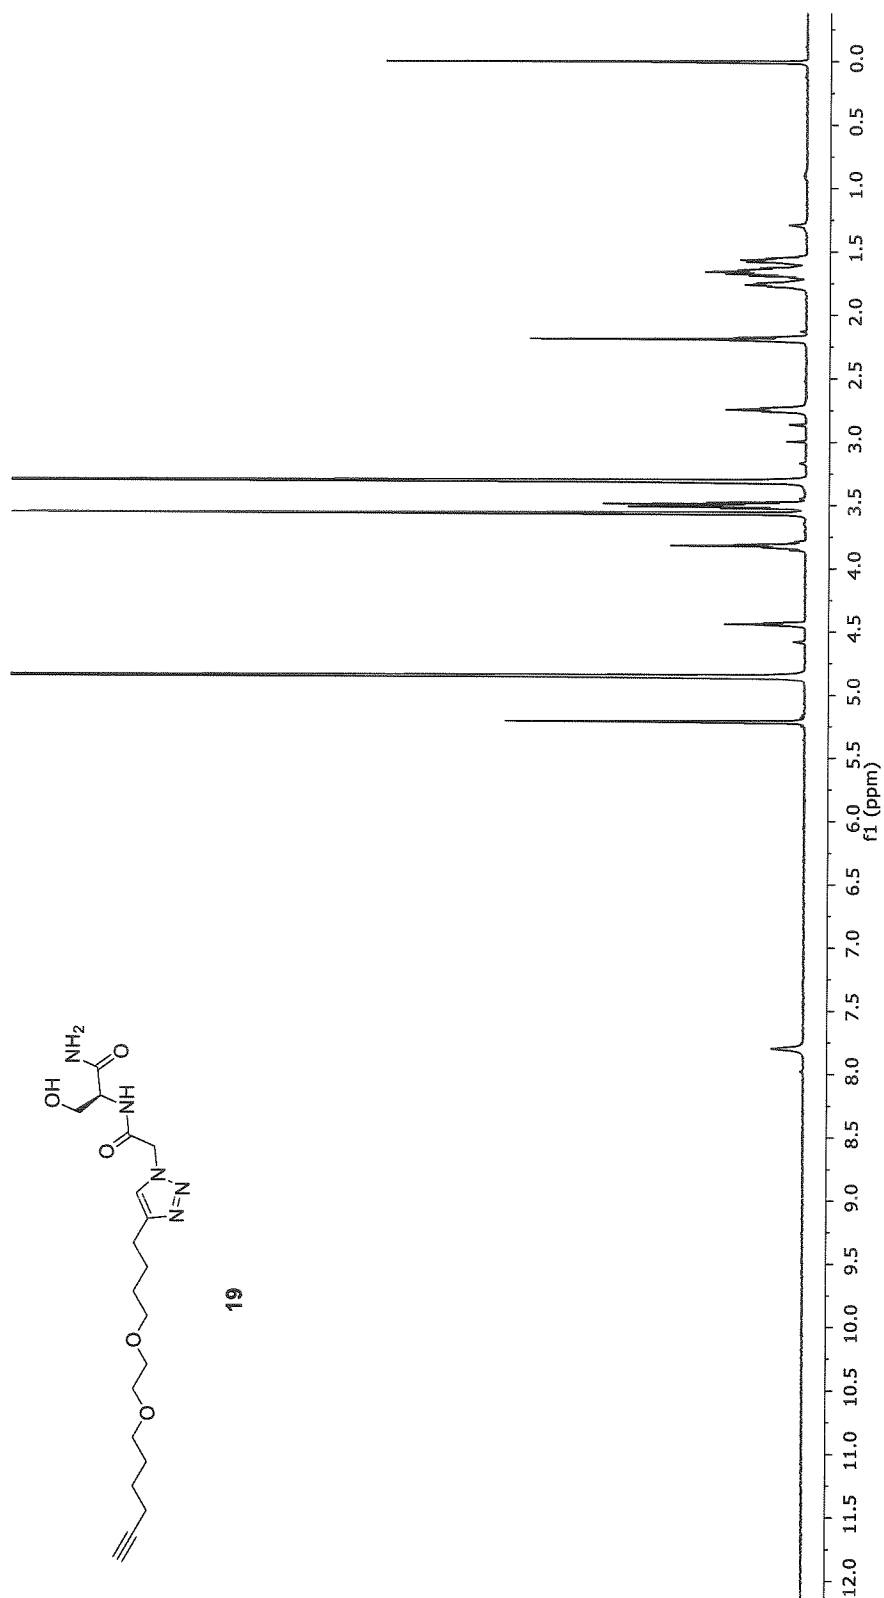

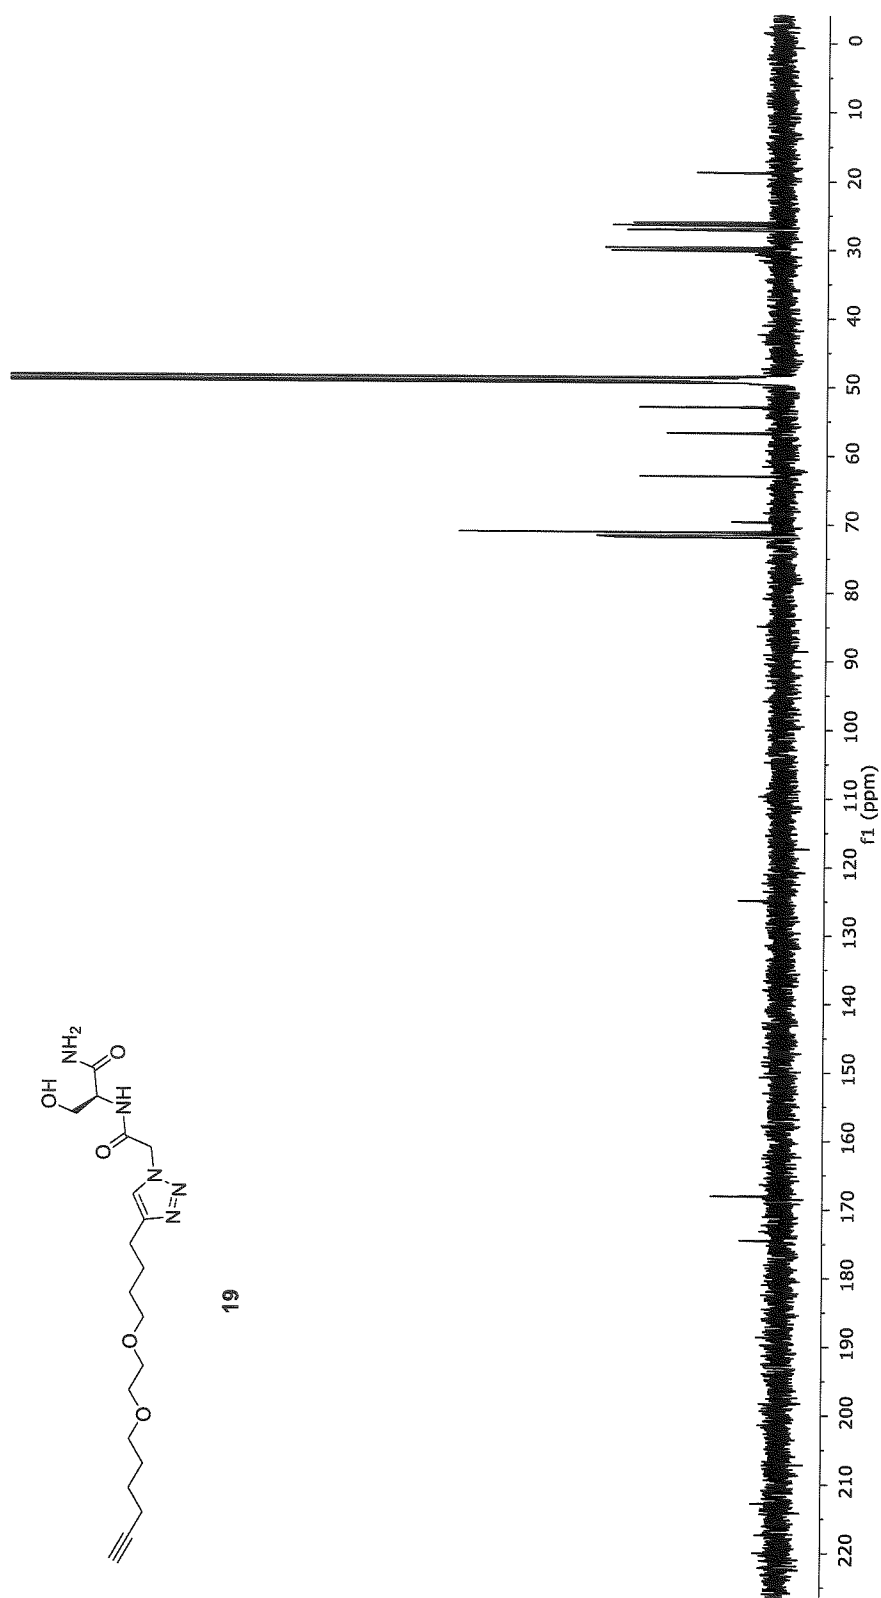

Reported by User: System

Project Name: BIO5\_HPLC1

## SAMPLE INFORMATION

Sample Name: Elshan CH-1-226  
Sample Type: Unknown  
Vial: 80  
Injection #: 1  
Injection Volume: 10.00 µl  
Run Time: 45.0 Minutes  
Sample Set Name Prime\_Run\_07\_19\_07

Acquired By: System  
Date Acquired: 6/5/2014 4:21:08 PM MDT  
Acq. Method Set: 10\_90B\_in  
Date Processed: 6/11/2014 1:41:38 PM MDT,  
Processing Method Peptide\_general  
Channel Name: 2487Channel 1, 2487Channel 2  
Proc. Chnl. Descr.: 220nm, 280nm

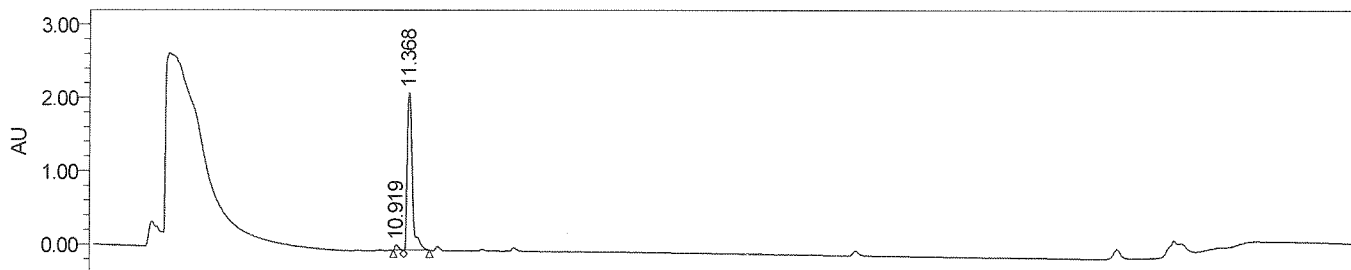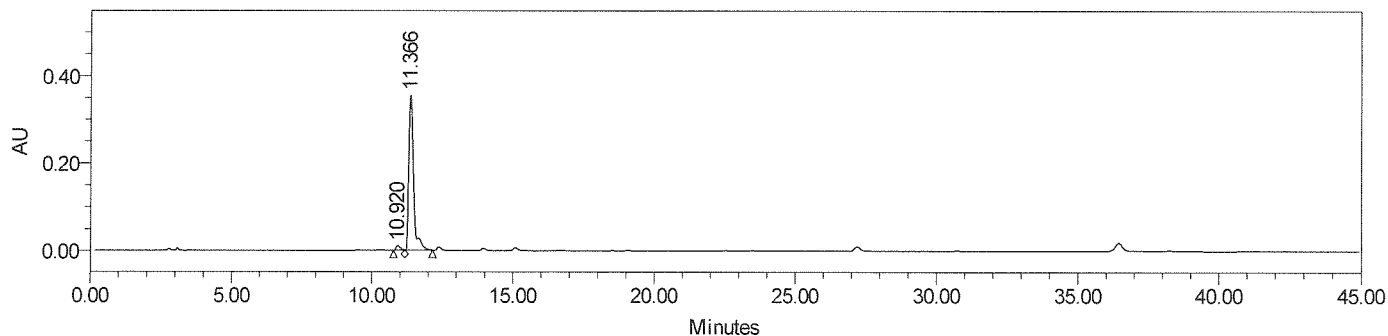

— Sample Name: Elshan CH-1-226; Proc. Chan. Descr. 220nm  
— Sample Name: Elshan CH-1-226; Proc. Chan. Descr. 280nm

Channel 220 nm  
Channel: 2487Channel 1

|   | RT     | Area<br>(µV*sec) | % Area | Channel       |
|---|--------|------------------|--------|---------------|
| 1 | 11.368 | 2.74e+007        | 97.69  | 2487Channel 1 |

Channel 280 nm  
Channel: 2487Channel 2

|   | RT     | Area<br>(µV*sec) | % Area | Channel       |
|---|--------|------------------|--------|---------------|
| 1 | 11.366 | 4.22e+006        | 97.45  | 2487Channel 2 |

### NOTES:

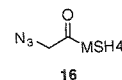

Reported by User: System

Project Name: BIO5\_HPLC1

## SAMPLE INFORMATION

Sample Name: Elshan CH-1-54  
Sample Type: Unknown  
Vial: 77  
Injection #: 1  
Injection Volume: 10.00  $\mu$ l  
Run Time: 45.0 Minutes  
Sample Set Name Prime\_Run\_07\_19\_07

Acquired By: System  
Date Acquired: 6/5/2014 2:02:47 PM MDT  
Acq. Method Set: 10\_90B\_in  
Date Processed: 6/11/2014 1:37:21 PM MDT,  
Processing Method Peptide\_general  
Channel Name: 2487Channel 1, 2487Channel 2  
Proc. Chnl. Descr.: 220nm, 280nm

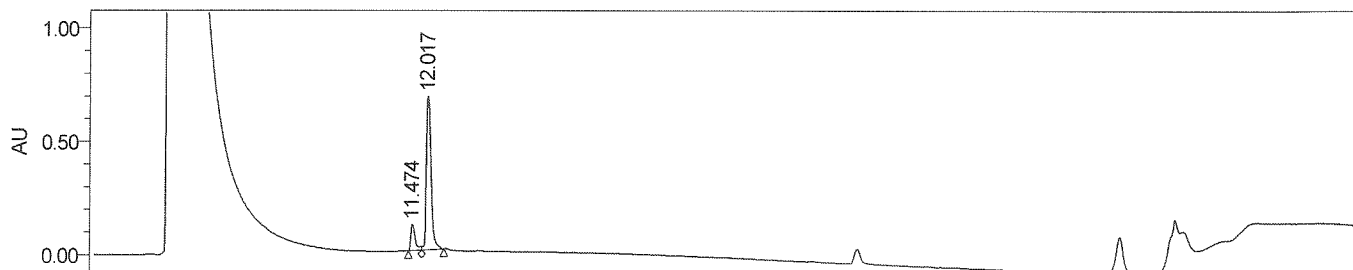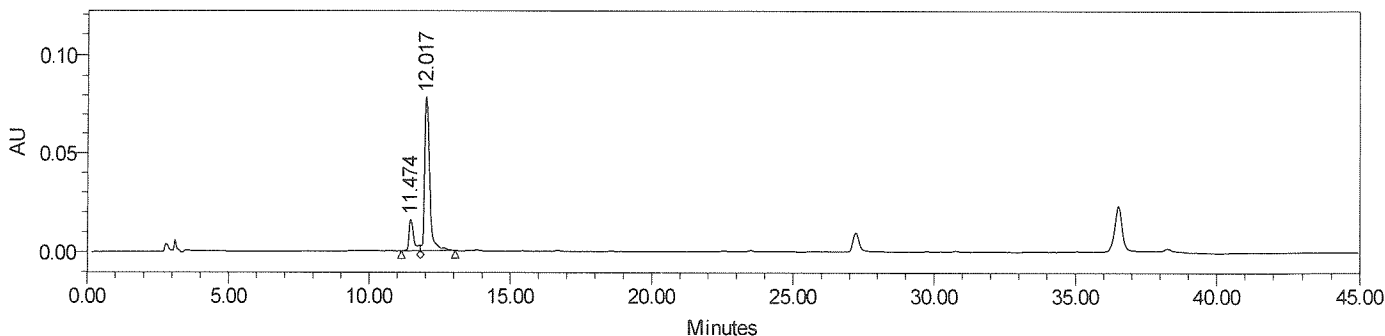

— Sample Name: Elshan CH-1-54; Proc. Chan. Descr. 220nm  
— Sample Name: Elshan CH-1-54; Proc. Chan. Descr. 280nm

Channel 220 nm  
Channel: 2487Channel 1

|   | RT     | Area<br>( $\mu$ V*sec) | % Area | Channel       |
|---|--------|------------------------|--------|---------------|
| 1 | 11.474 | 1.27e+006              | 13.77  | 2487Channel 1 |
| 2 | 12.017 | 7.94e+006              | 86.23  | 2487Channel 1 |

Channel 280 nm  
Channel: 2487Channel 2

|   | RT     | Area<br>( $\mu$ V*sec) | % Area | Channel       |
|---|--------|------------------------|--------|---------------|
| 1 | 11.474 | 1.88e+005              | 16.22  | 2487Channel 2 |
| 2 | 12.017 | 9.73e+005              | 83.78  | 2487Channel 2 |

### NOTES:

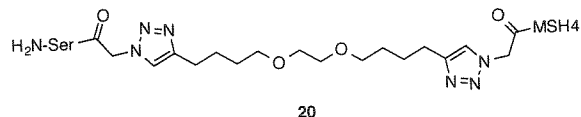

Reported by User: System

Project Name: BIO5\_HPLC1

## SAMPLE INFORMATION

|                                     |                                            |
|-------------------------------------|--------------------------------------------|
| Sample Name: Elshan CH-1-267        | Acquired By: System                        |
| Sample Type: Unknown                | Date Acquired: 6/5/2014 7:25:54 PM MDT     |
| Vial: 84                            | Acq. Method Set: 10_90B_in                 |
| Injection #: 1                      | Date Processed: 6/11/2014 1:46:00 PM MDT,  |
| Injection Volume: 10.00 ul          | Processing Method: Peptide_general         |
| Run Time: 45.0 Minutes              | Channel Name: 2487Channel 1, 2487Channel 2 |
| Sample Set Name: Prime_Run_07_19_07 | Proc. Chnl. Descr.: 220nm, 280nm           |

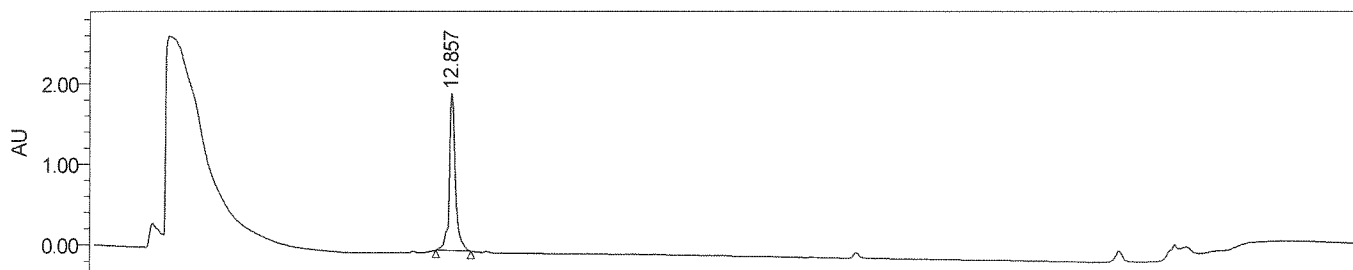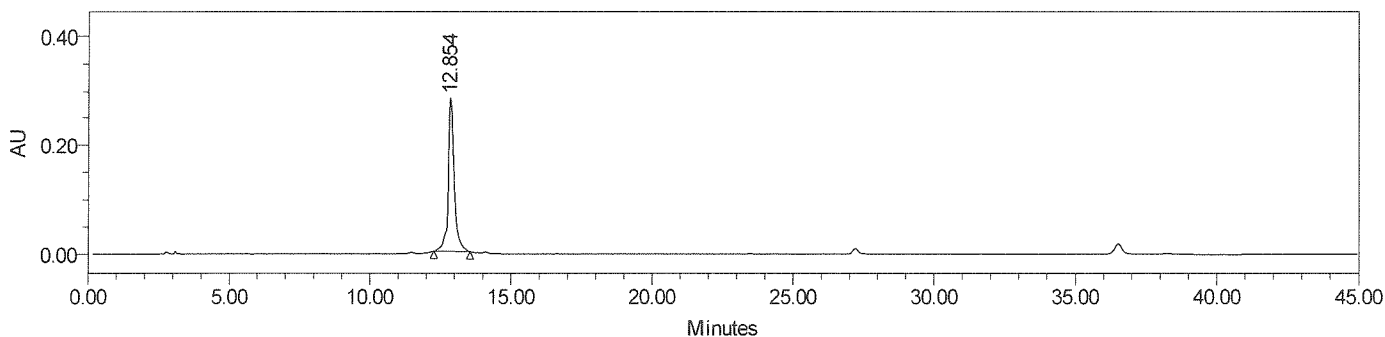

— Sample Name: Elshan CH-1-267; Proc. Chan. Descr. 220nm  
 — Sample Name: Elshan CH-1-267; Proc. Chan. Descr. 280nm

Channel 220 nm  
Channel: 2487Channel 1

|   | RT     | Area<br>( $\mu\text{V}\cdot\text{sec}$ ) | % Area | Channel       |
|---|--------|------------------------------------------|--------|---------------|
| 1 | 12.857 | 2.93e+007                                | 100.00 | 2487Channel 1 |

Channel 280 nm  
Channel: 2487Channel 2

|   | RT     | Area<br>( $\mu\text{V}\cdot\text{sec}$ ) | % Area | Channel       |
|---|--------|------------------------------------------|--------|---------------|
| 1 | 12.854 | 4.17e+006                                | 100.00 | 2487Channel 2 |

### NOTES:

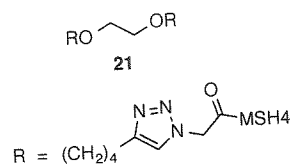



Reported by User: System

Project Name: BIO5\_HPLC1

## SAMPLE INFORMATION

Sample Name: Elshan CH-1-259  
Sample Type: Unknown  
Vial: 82  
Injection #: 1  
Injection Volume: 10.00 ul  
Run Time: 45.0 Minutes  
Sample Set Name Prime\_Run\_07\_19\_07

Acquired By: System  
Date Acquired: 6/5/2014 5:53:42 PM MDT  
Acq. Method Set: 10\_90B\_in  
Date Processed: 6/11/2014 1:43:55 PM MDT,  
Processing Method Peptide\_general  
Channel Name: 2487Channel 1, 2487Channel 2  
Proc. Chnl. Descr.: 220nm, 280nm

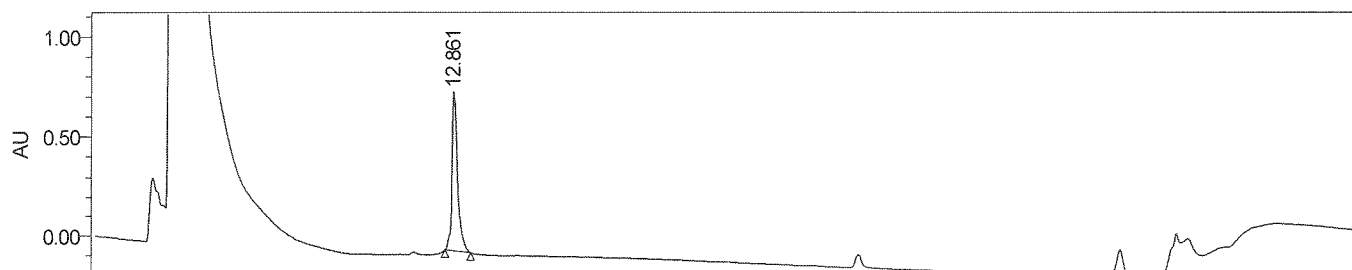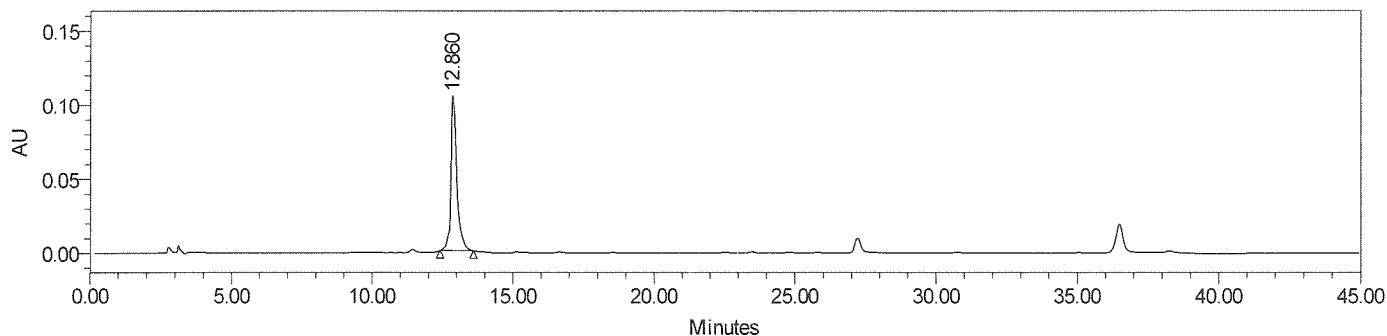

— Sample Name: Elshan CH-1-259; Proc. Chan. Descr. 220nm  
— Sample Name: Elshan CH-1-259; Proc. Chan. Descr. 280nm

Channel 220 nm  
Channel: 2487Channel 1

|   | RT     | Area<br>( $\mu\text{V}\cdot\text{sec}$ ) | % Area | Channel       |
|---|--------|------------------------------------------|--------|---------------|
| 1 | 12.861 | 1.12e+007                                | 100.00 | 2487Channel 1 |

Channel 280 nm  
Channel: 2487Channel 2

|   | RT     | Area<br>( $\mu\text{V}\cdot\text{sec}$ ) | % Area | Channel       |
|---|--------|------------------------------------------|--------|---------------|
| 1 | 12.860 | 1.53e+006                                | 100.00 | 2487Channel 2 |

### NOTES:

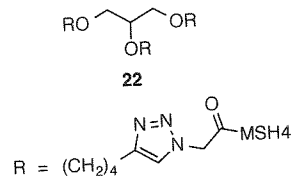

Reported by User: System

Project Name: BIO5\_HPLC1

## SAMPLE INFORMATION

|                                     |                                            |
|-------------------------------------|--------------------------------------------|
| Sample Name: Elshan CH-1-261        | Acquired By: System                        |
| Sample Type: Unknown                | Date Acquired: 6/5/2014 6:39:47 PM MDT     |
| Vial: 83                            | Acq. Method Set: 10_90B_in                 |
| Injection #: 1                      | Date Processed: 6/11/2014 1:44:56 PM MDT,  |
| Injection Volume: 10.00 ul          | Processing Method: Peptide_general         |
| Run Time: 45.0 Minutes              | Channel Name: 2487Channel 1, 2487Channel 2 |
| Sample Set Name: Prime_Run_07_19_07 | Proc. Chnl. Descr.: 220nm, 280nm           |

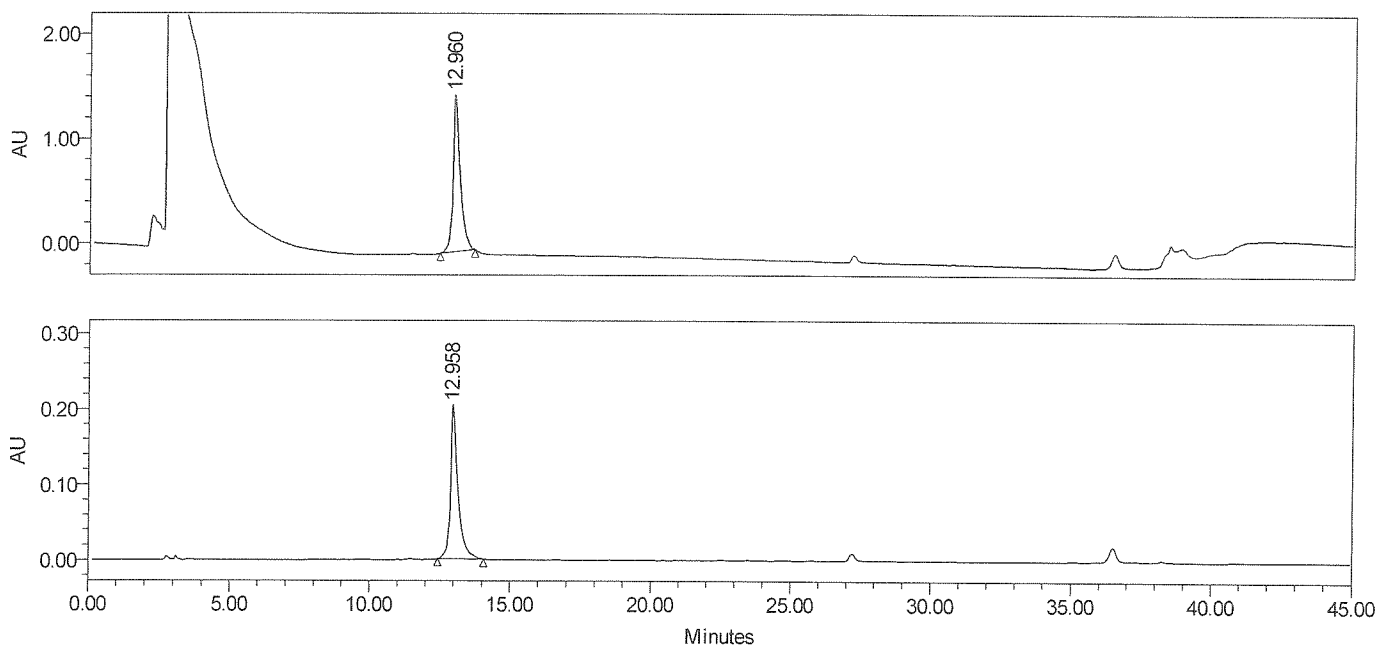

— Sample Name: Elshan CH-1-261; Proc. Chan. Descr. 220nm  
 — Sample Name: Elshan CH-1-261; Proc. Chan. Descr. 280nm

Channel 220 nm  
Channel: 2487Channel 1

|   | RT     | Area<br>( $\mu V \cdot sec$ ) | % Area | Channel       |
|---|--------|-------------------------------|--------|---------------|
| 1 | 12.960 | 2.64e+007                     | 100.00 | 2487Channel 1 |

Channel 280 nm  
Channel: 2487Channel 2

|   | RT     | Area<br>( $\mu V \cdot sec$ ) | % Area | Channel       |
|---|--------|-------------------------------|--------|---------------|
| 1 | 12.958 | 3.80e+006                     | 100.00 | 2487Channel 2 |

NOTES:

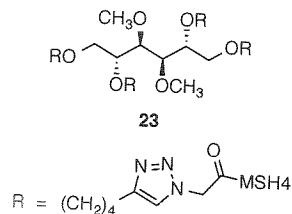

## Data Analysis for the Binding Assays

Biological data analysis was performed using GraphPad Prism software (version 5.04) using the following analysis methods.

### **Saturation Binding Data**

The Total Binding and Non-specific Binding curves in Figure 1 were generated from the binding assay data using nonlinear regression analysis and fitted to the “One site - Total and nonspecific binding” equations (Equations S1 and S2).

$$\text{Specific} = B_{\max} * X / (X + K_d) \quad (\text{Equation S1})$$

$$\text{Nonspecific} = \text{NS} * X + \text{Background} \quad (\text{Equation S2})$$

For Total Binding:  $Y = \text{specific} + \text{nonspecific}$

For Nonspecific binding:  $Y = \text{nonspecific}$

Where

- $B_{\max}$  is the maximum specific binding in the same units as Y.
- $K_d$  is the equilibrium binding constant, in the same units as X. It is the labeled ligand concentration needed to achieve a half-maximum binding at equilibrium.
- NS is the slope of nonspecific binding in Y units divided by X units.
- Background is the amount of nonspecific binding with no added labeled ligand. This represents counter background. If the counter automatically subtracts off the background signal, Background can be constrained to a constant value of zero.

The Specific Binding curve in Figure 1 was generated from data derived by taking the difference between the Total and Nonspecific binding data, using nonlinear regression analysis, and fitting to the “One site - Specific binding” equation (Equation S3).

$$\text{Specific} = B_{\max} * X / (X + K_d) \quad (\text{Equation S3})$$

### **Competitive Binding Data**

Competitive binding data were analyzed using nonlinear regression analysis and fitted to the “One site - Fit  $K_i$ ” equation.

$$\log EC_{50} = \log (10^{\log K_i * (1 + [L] / [Hot K_d])}) \quad (\text{Equation S4})$$

$$Y = \text{Bottom} + (\text{Top} - \text{Bottom}) / (1 + 10^{(X - \log EC_{50})}) \quad (\text{Equation S5})$$

Where

- Top and Bottom are plateaus in the units of the Y axis.
- $K_i$  is the molar equilibrium dissociation constant of the unlabeled ligand.
- $[L]$  is the concentration of labeled ligand in nM. Here  $[L] = 20$  nM
- $[Hot K_d]$  is the equilibrium dissociation constant of the labeled ligand in nM. Here  $[Hot K_d] = 21$  nM.

## Molecular Dynamics Studies

Molecular dynamics (MD) calculation trials were performed in triplicate on compounds **21-23** using the AMBER99 force field and the MD program contained in MOE® to obtain representative conformations at 310K. The initial structure of each molecule was minimized, then solvated in a water sphere (compound **21**- 4487 H<sub>2</sub>O, compound **22**- 5490 H<sub>2</sub>O, compound **23**- 5308 H<sub>2</sub>O), and again minimized. The results (depicted) were used as the starting structures for each calculation trial. One carbon of the core scaffold was fixed within the solvation sphere (**21**, ethylene glycol C1; **22**, glycerol C2; **23**, mannitol C3) to avoid migration of the molecule toward the edge of the water sphere during MD. Initial calculations performed using compound **22** showed convergence of the structure within 1 ns of a 5 ns production run, therefore subsequent production calculation durations were set at 1 ns. MD consisted of heating the molecule from 300 to 310 K over 250 ps, equilibration for 250 ps, and production for 1 ns. Trajectories were recorded every 0.5 ps.

The lowest energy structure of the production run for each trial was compared to the starting structure by graphical overlayment (see Figure 4 in the article). Inter-ligand distance measurements (from the N-terminal nitrogen atoms of the histidine residues) are shown for the starting structures. The graphs represent the inter-ligand distances for each individual trial with the exception of the graph for compound **21**, which contains all three trials on one graph.

| scaffold origin | ligand labeling                                                                     |
|-----------------|-------------------------------------------------------------------------------------|
| ethylene glycol |  |
| glycerol        |  |
| D-mannitol      |  |

## Average Inter-Ligand Distances<sup>a</sup>

| Compound (inter-ligand distance measured)                                                                                                                                 | Average Inter-Ligand Distance (Å) |
|---------------------------------------------------------------------------------------------------------------------------------------------------------------------------|-----------------------------------|
| <b>21</b> (L <sub>1</sub> -L <sub>2</sub> )                                                                                                                               | 21.06±0.62                        |
| <b>22</b> (L <sub>1</sub> -L <sub>2</sub> )                                                                                                                               | 22.99±0.28                        |
| <b>23</b> (L <sub>2</sub> -L <sub>4</sub> )                                                                                                                               | 27.84±0.64                        |
| <sup>a</sup> The values reported for compounds <b>22</b> and <b>23</b> are the averages for the two ligands giving the greatest inter-ligand distances for that compound. |                                   |

# Compound 21

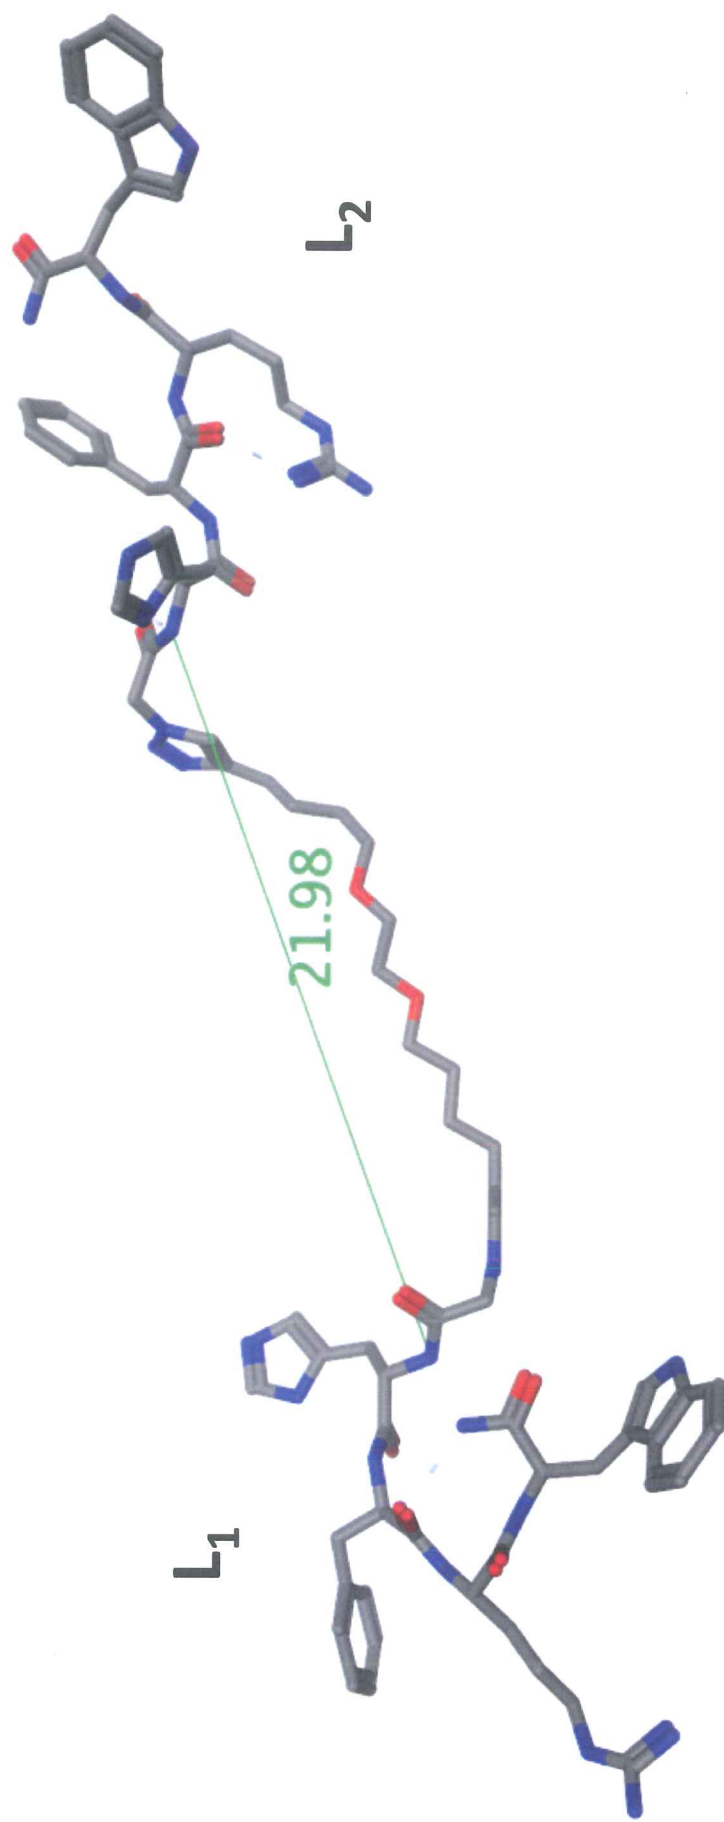

Figure S1: Starting minimized structure with inter-ligand distance measurement.

# Compound 21

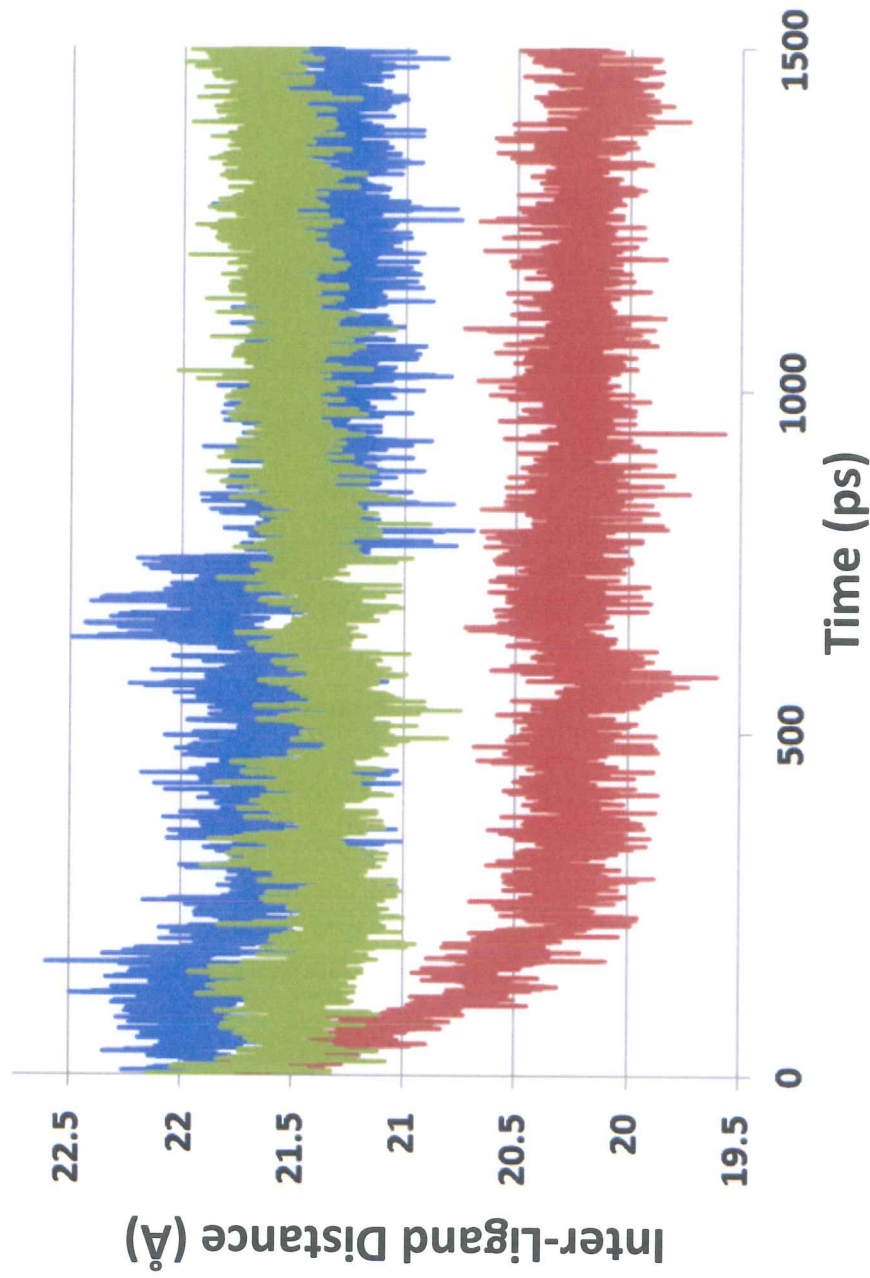

|                                             |            |            |            |
|---------------------------------------------|------------|------------|------------|
| Compound 21                                 | Trial 1    | Trial 2    | Trial 3    |
| L <sub>1</sub> -L <sub>2</sub> Distance (Å) | 21.45±0.26 | 20.23±0.16 | 21.49±0.18 |

Figure S2: Average Inter-Ligand Distance for Each Compound 21 Trial

# Compound 21

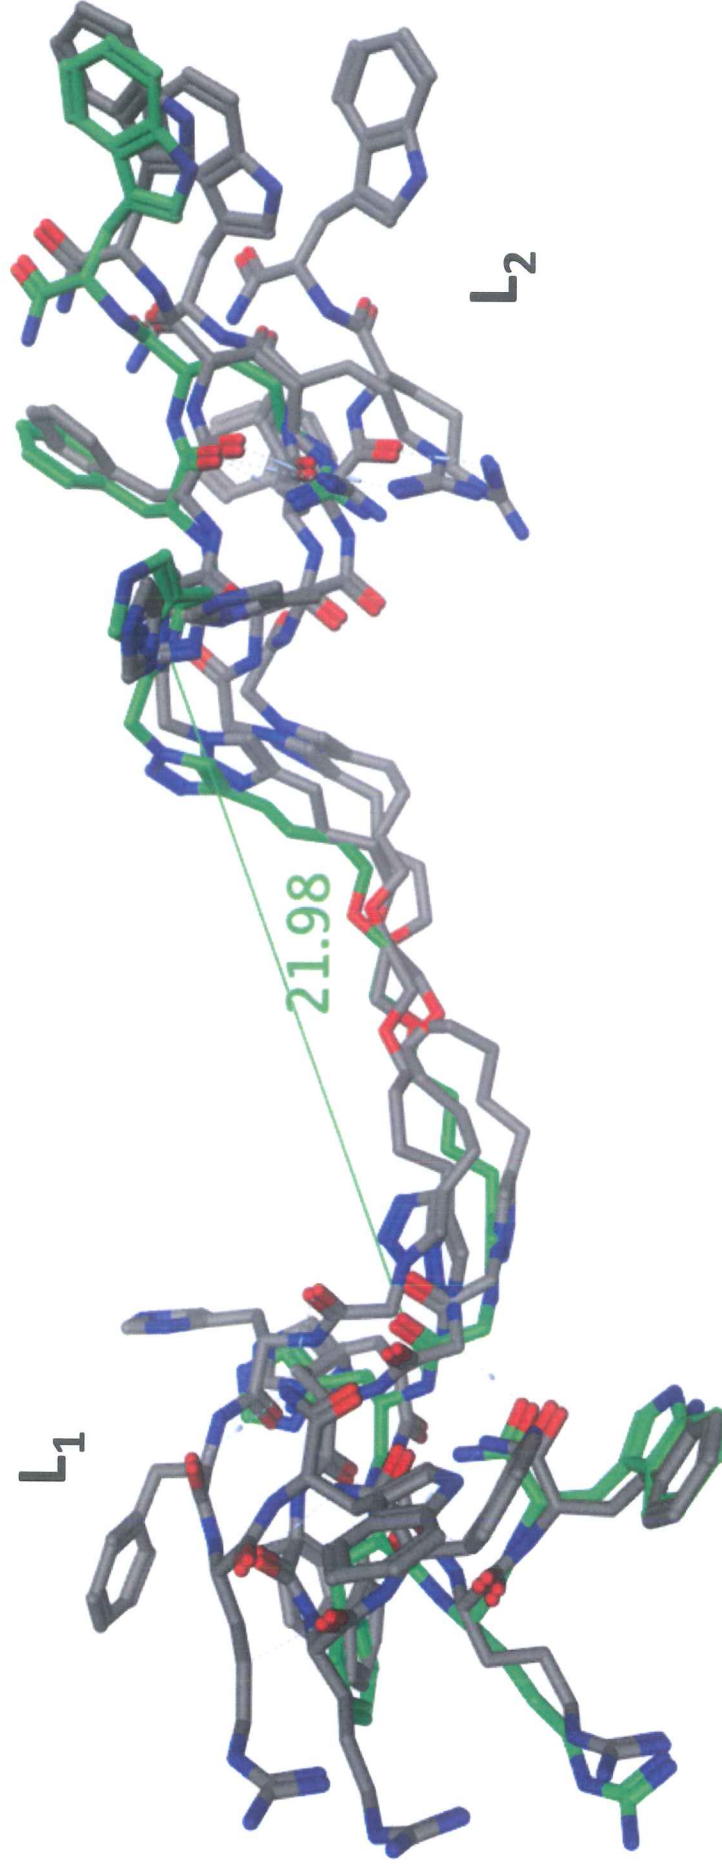

**Figure S3:** Lowest energy structure from each trial with starting minimized structure in green.



## Compound 22

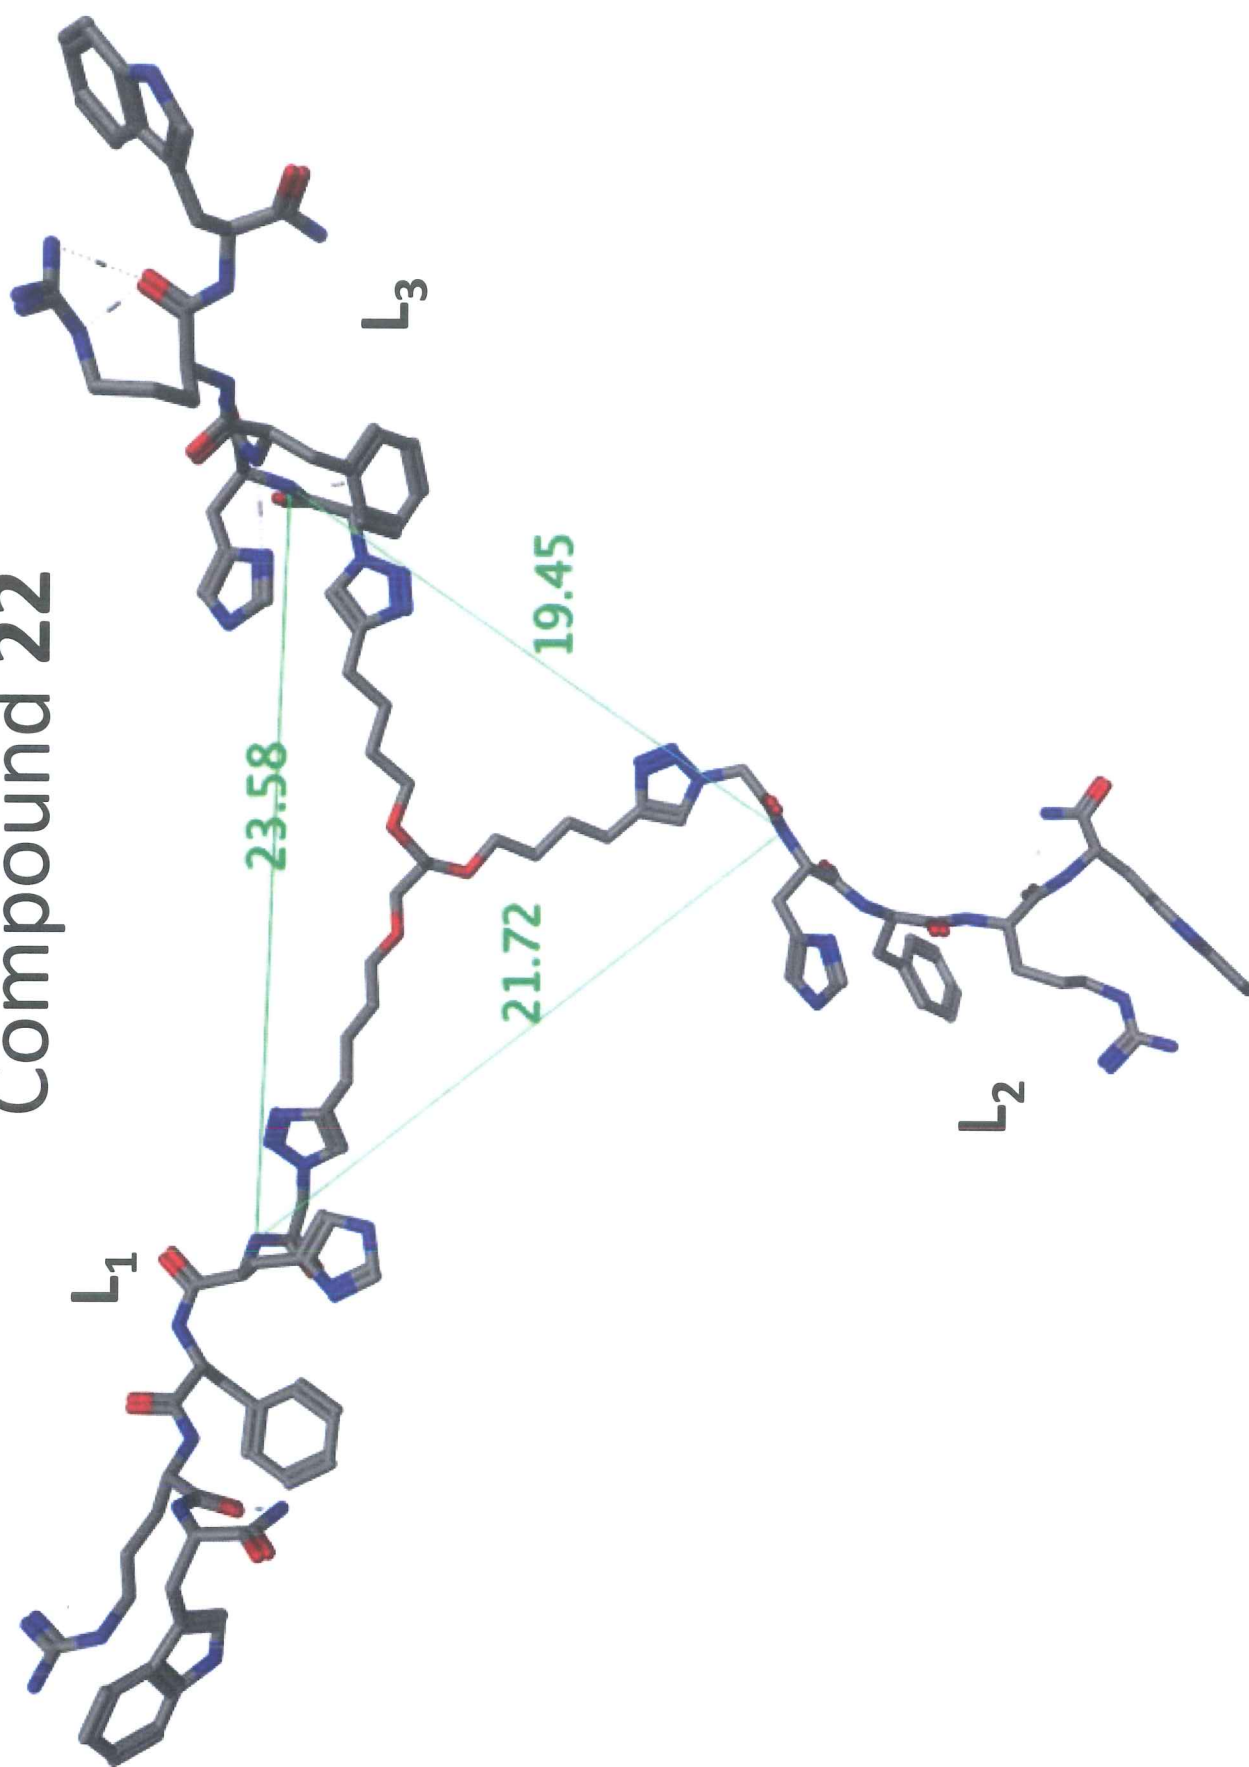

Figure S4: Starting minimized structure with inter-ligand distance measurements.

# Compound 22

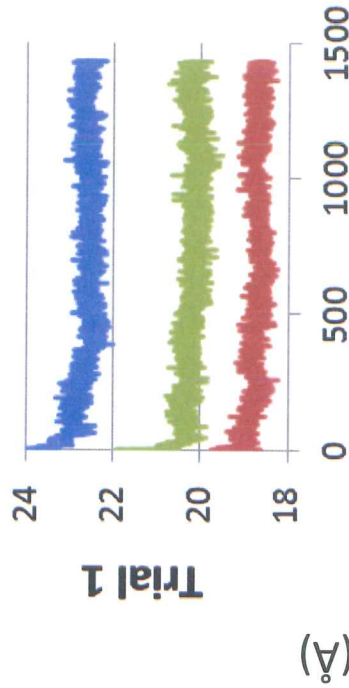

Inter-Ligand Distance (Å)

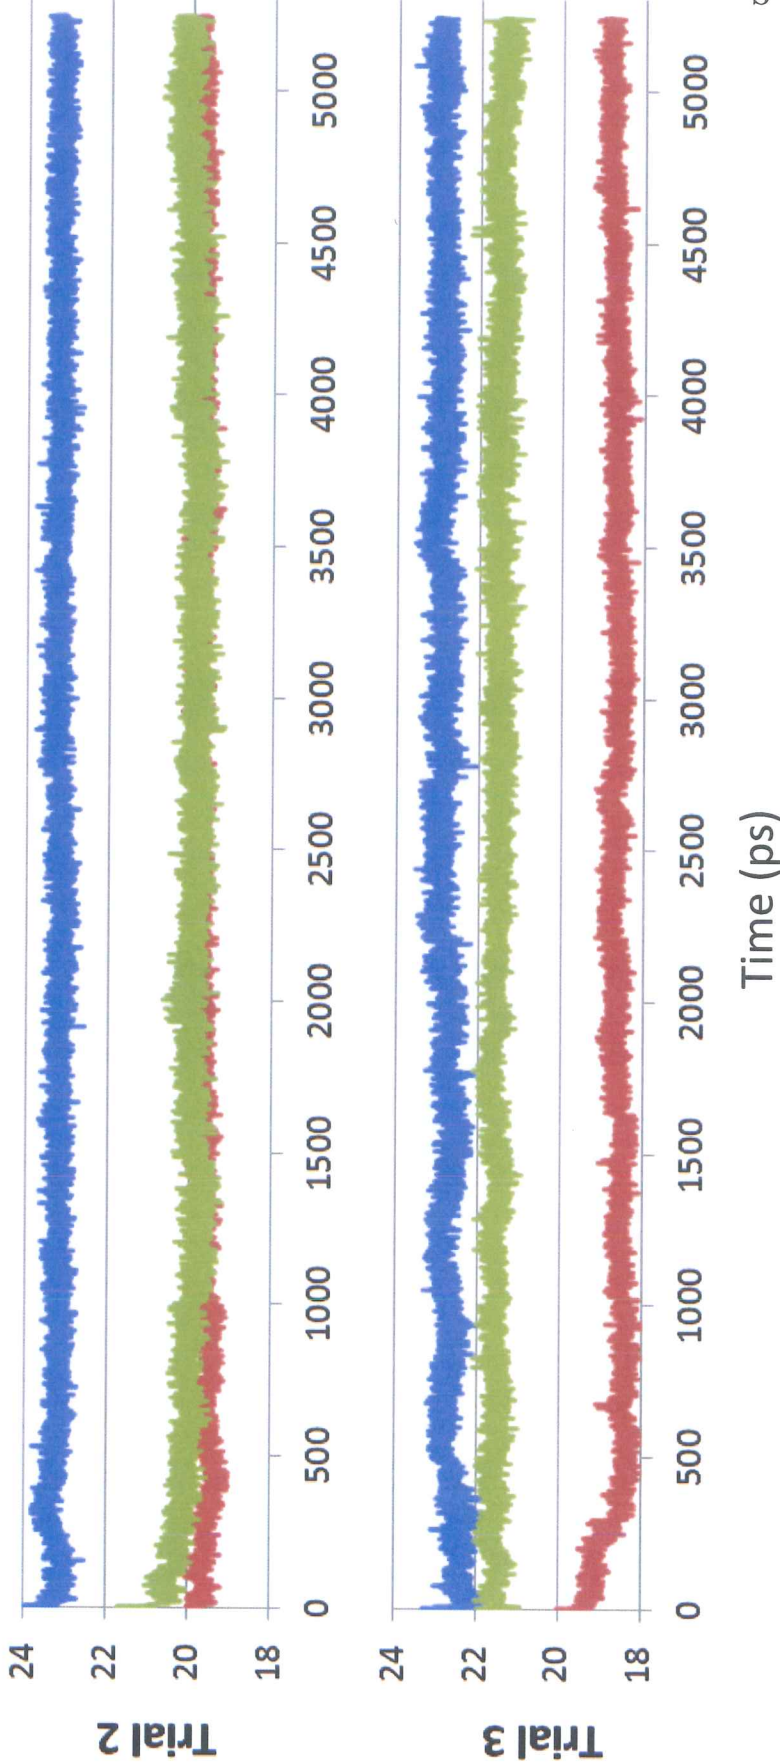

| Distance (Å) | L <sub>1</sub> -L <sub>2</sub> | L <sub>2</sub> -L <sub>3</sub> | L <sub>1</sub> -L <sub>3</sub> |
|--------------|--------------------------------|--------------------------------|--------------------------------|
| Trial 1      | 20.13±0.17                     | 18.69±0.14                     | 22.59±0.15                     |
| Trial 2      | 19.92±0.23                     | 19.71±0.16                     | 23.21±0.16                     |
| Trial 3      | 21.53±0.18                     | 18.64±0.19                     | 22.86±0.21                     |

**Figure S5:** Average Inter-Ligand Distances for Each Compound **22** Trial

Time (ps)

# Compound 22

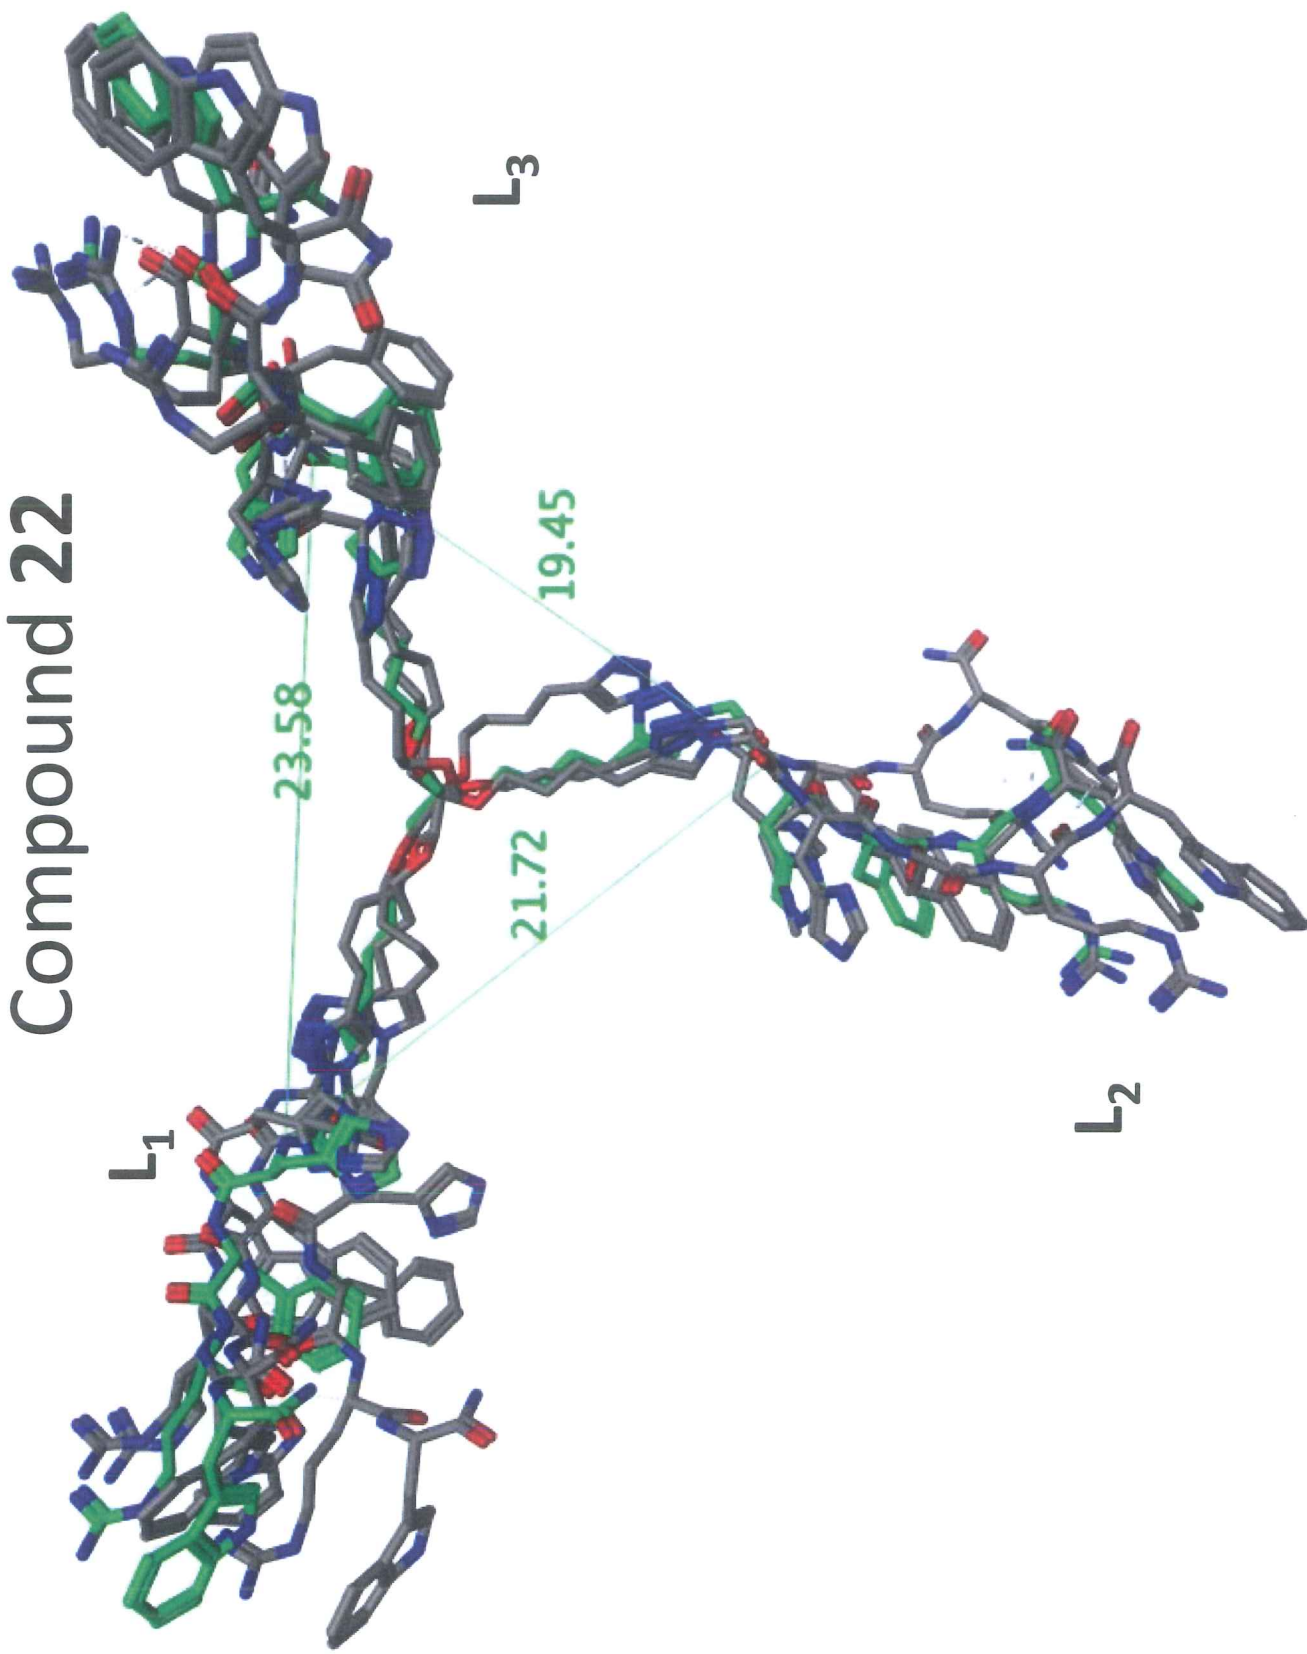

Figure S6: Lowest energy structure from each trial with starting minimized structure in green.

# Compound 23

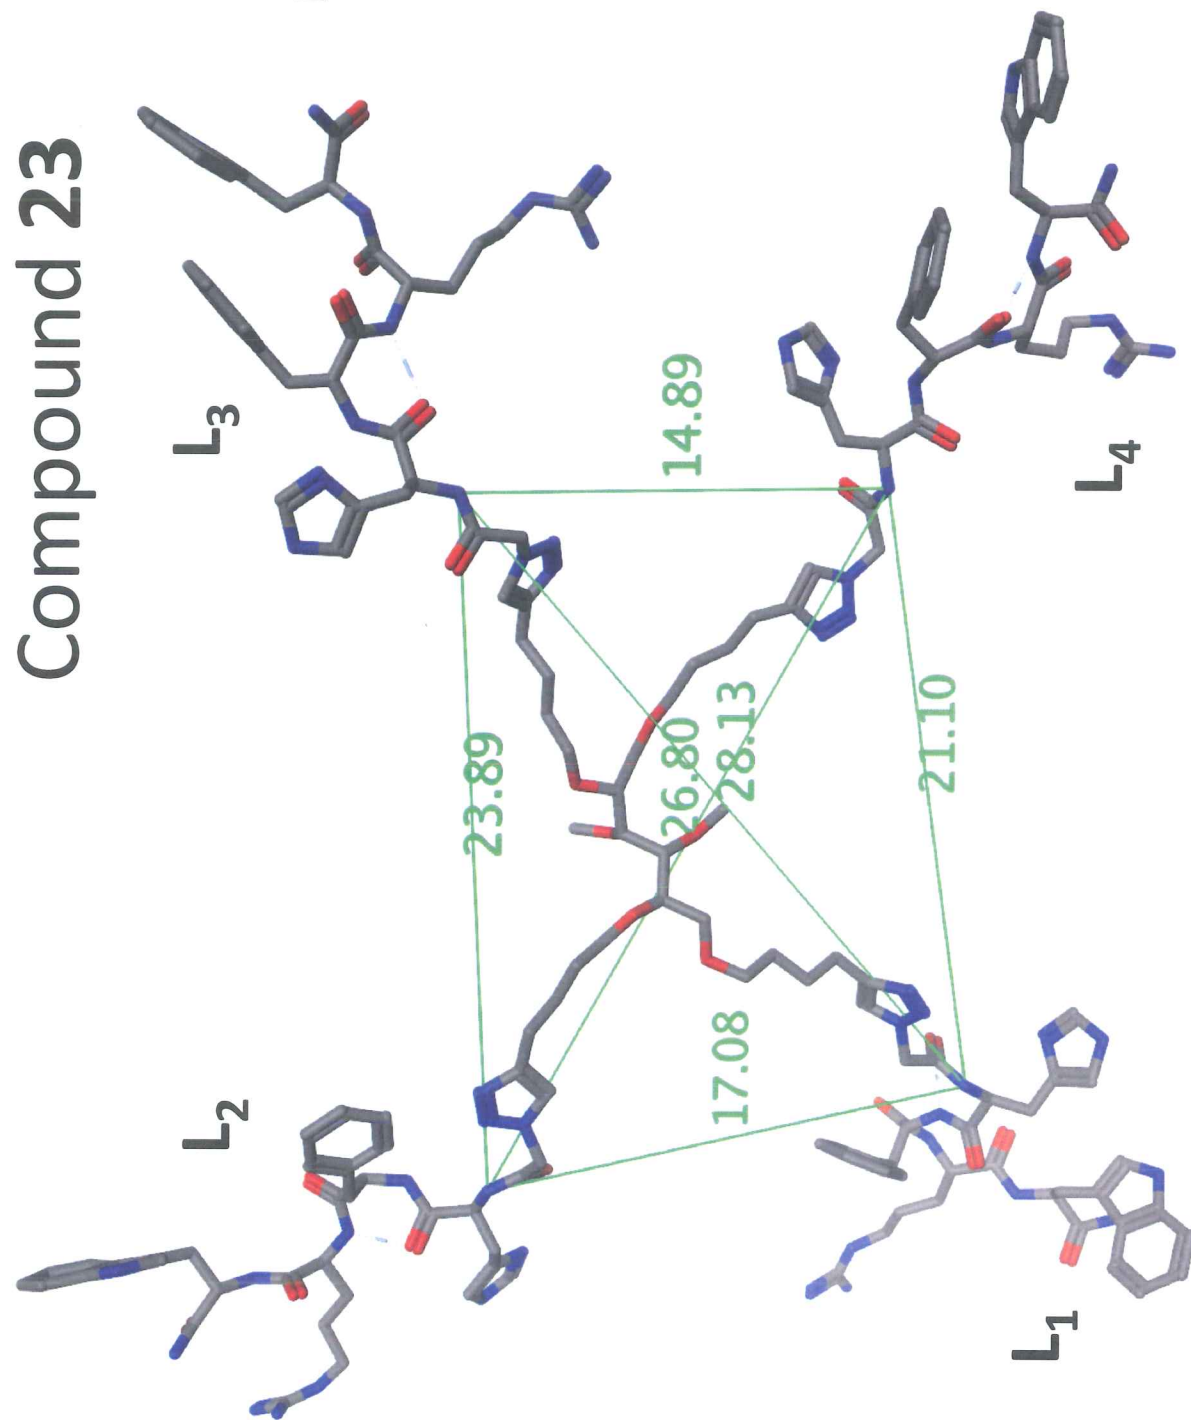

Initial Distance (Å)

$$L_2-L_4 = 28.13$$

$$L_1-L_3 = 26.80$$

$$L_2-L_3 = 23.89$$

$$L_1-L_4 = 21.10$$

$$L_1-L_2 = 17.08$$

$$L_3-L_4 = 14.89$$

Figure S7: Starting minimized structure with inter-ligand distance measurements.



# Compound 23

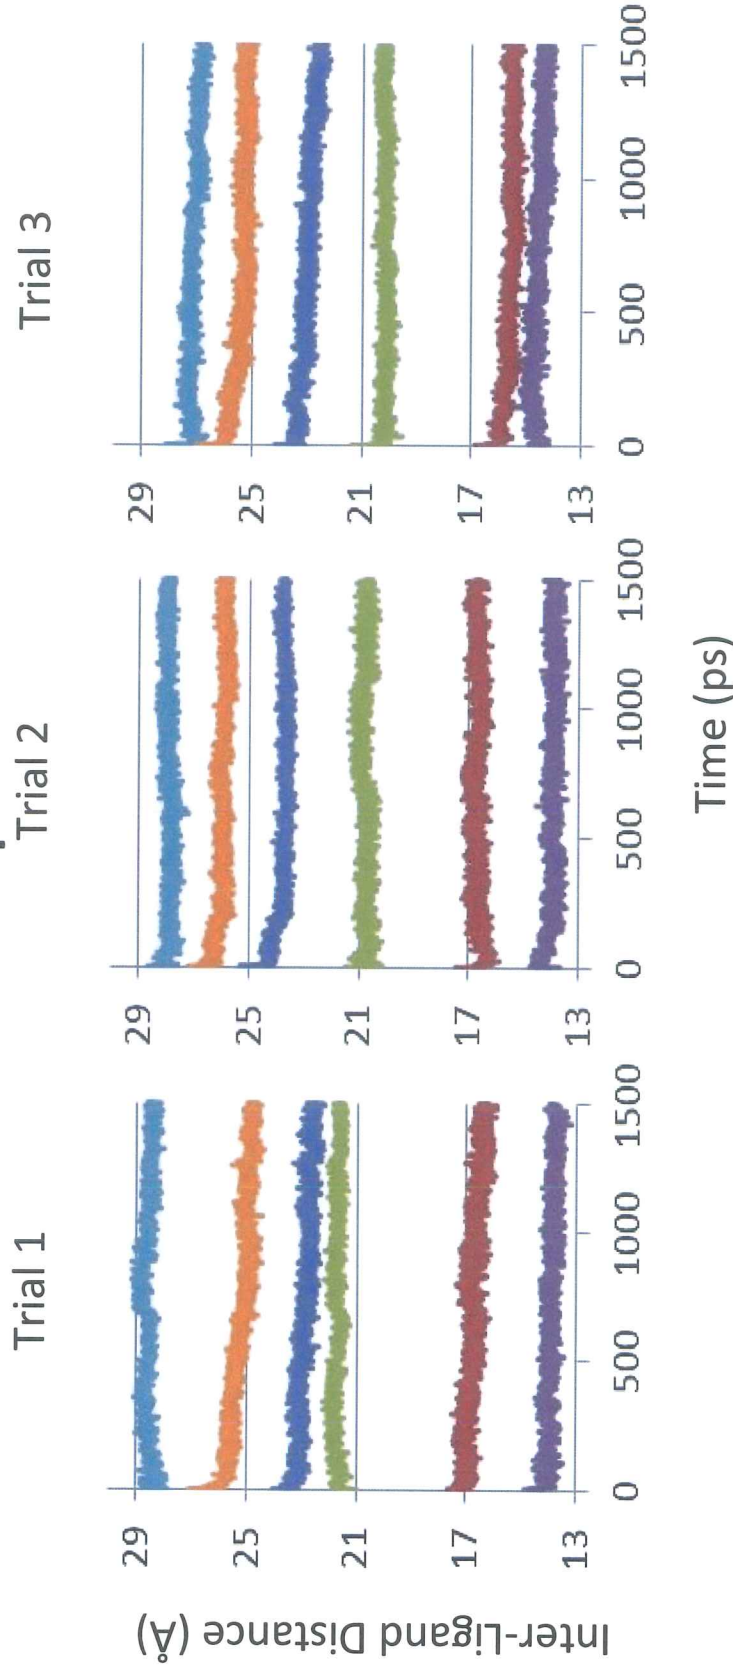

| Distance (Å) | $L_2-L_4$  | $L_1-L_3$  | $L_2-L_3$  | $L_1-L_4$  | $L_1-L_2$  | $L_3-L_4$  |
|--------------|------------|------------|------------|------------|------------|------------|
| Trial 1      | 28.57±0.18 | 25.02±0.20 | 22.77±0.18 | 21.72±0.14 | 16.64±0.23 | 13.87±0.16 |
| Trial 2      | 27.91±0.16 | 25.93±0.15 | 23.67±0.13 | 20.84±0.19 | 16.72±0.18 | 13.96±0.16 |
| Trial 3      | 27.06±0.18 | 25.27±0.15 | 22.86±0.21 | 20.17±0.14 | 15.55±0.15 | 14.49±0.18 |

**Figure S8:** Average Inter-Ligand Distances for Each Compound **23** Trial

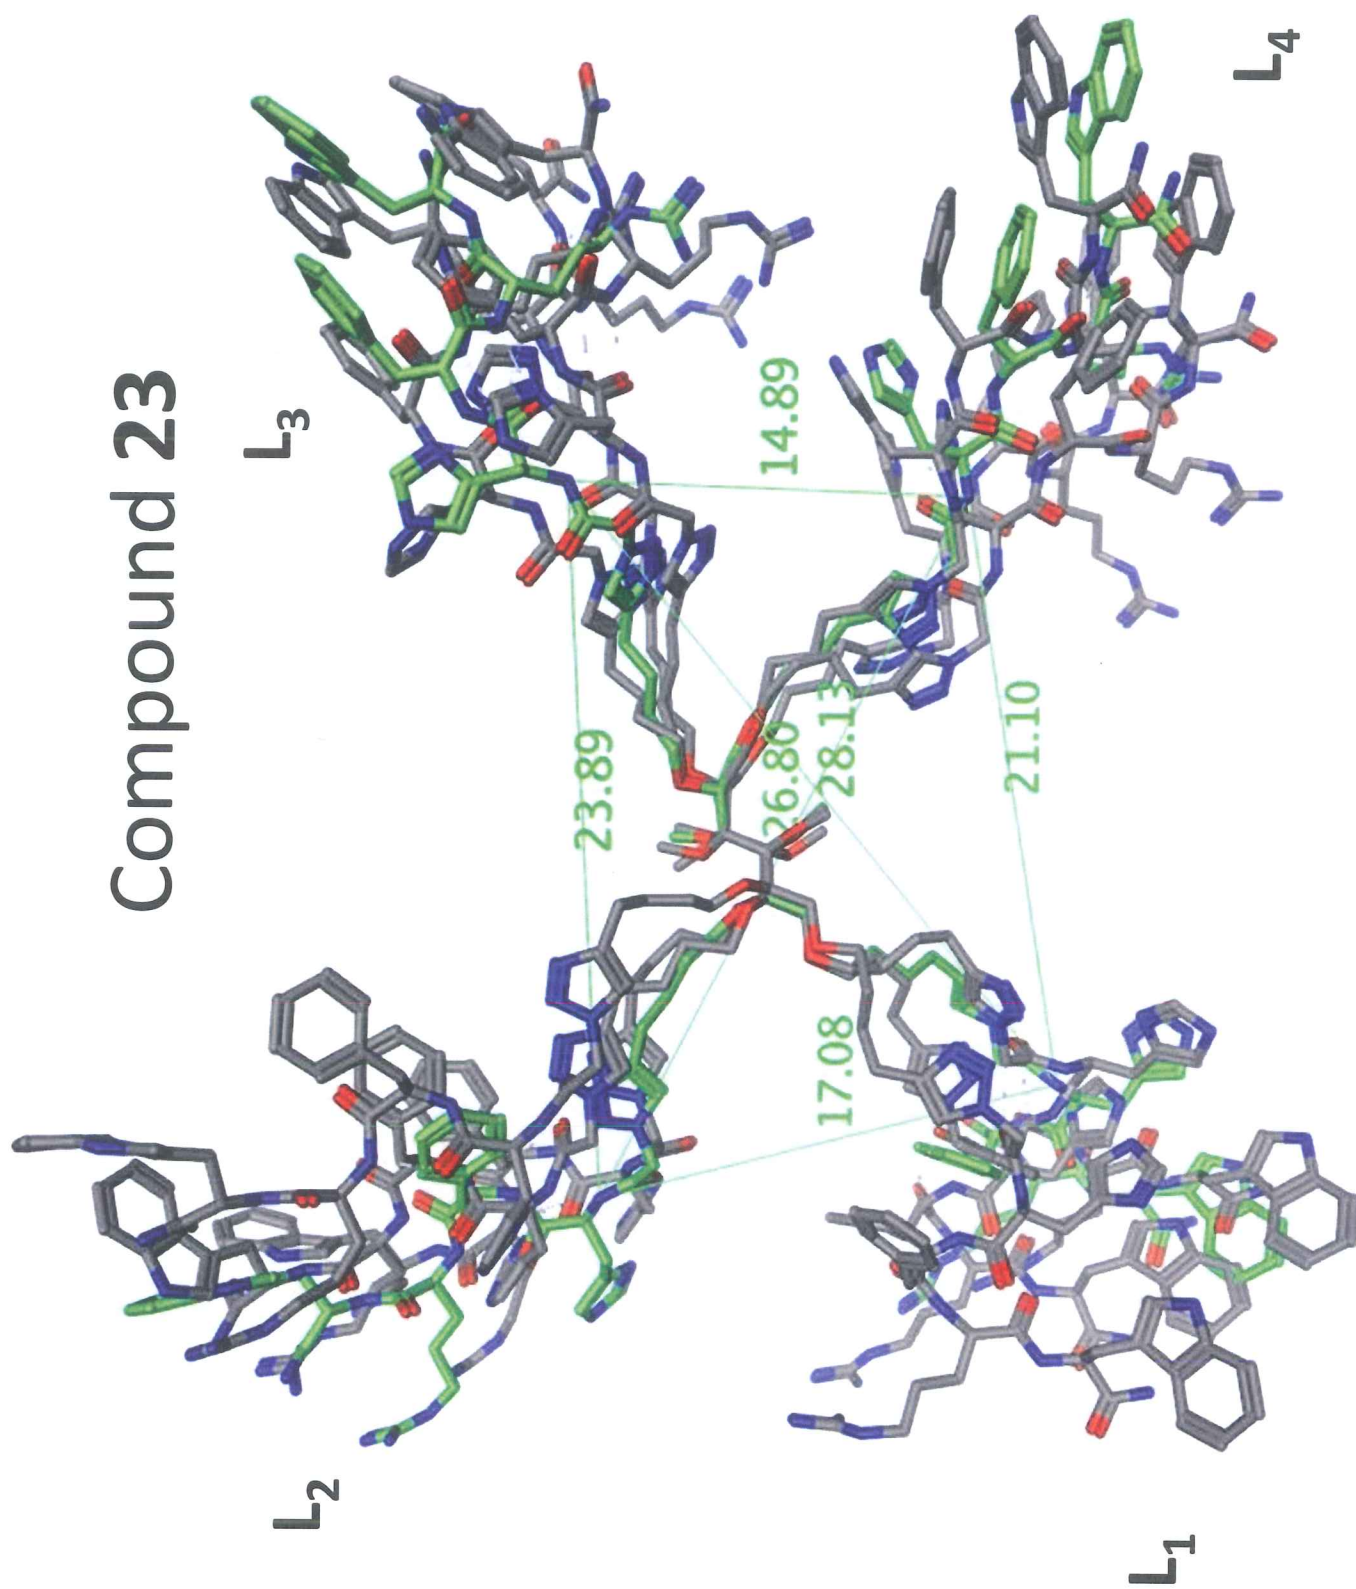

Figure S9: Lowest energy structure from each trial with starting minimized structure in green.
